1  
2 **An implicit memory of errors limits human sensorimotor adaptation**

3  
4 Scott T. Albert<sup>1</sup>, Jihoon Jang<sup>1</sup>, Hannah Sheahan<sup>2</sup>, Lonneke Teunissen<sup>3</sup>,  
5 Koenraad Vandevoorde<sup>4</sup>, and Reza Shadmehr<sup>1</sup>  
6

7 1. Department of Biomedical Engineering, Johns Hopkins School of Medicine, Baltimore MD

8 2. Dept. of Experimental Psychology, University of Oxford, Oxford UK

9 3. Donders Institute for Brain, Cognition and Behaviour, Radboud University, Nijmegen Netherlands

10 4. Leuven Brain Institute, KU Leuven, Leuven Belgium.  
11

12 **Correspondence:** Scott Albert, 416 Traylor Building, Johns Hopkins School of Medicine, 720 Rutland  
13 Ave., Baltimore, MD 21205, USA. Email: salbert8@jhmi.edu. Phone: 410-614-3424.  
14

15 **Acknowledgements:** This work was supported by grants from the National Institutes of Health  
16 (R01NS078311, F32NS095706), the National Science Foundation (CNS-1714623), the Cambridge Trust,  
17 the Rutherford Foundation, and a travel grant from the Boehringer Ingelheim Fonds. Additionally, we  
18 would like to thank Hugo Fernandes and Konrad Kording for so graciously compiling and sharing their  
19 data with us. Finally, we would like to recognize the Summer School in Computational Sensory-Motor  
20 Neuroscience (CoSMo) and its organizers (Gunnar Blohm, Konrad Kording, and Paul Schrater), for giving  
21 us the opportunity to learn and develop the original idea for this work.

## 22 **Abstract**

23 After extended practice, motor adaptation reaches a limit in which learning appears to stop, despite the  
24 fact that residual errors persist. What prevents the brain from eliminating the residual errors? Here we  
25 found that the adaptation limit was causally dependent on the second order statistics of the  
26 perturbation; when variance was high, learning was impaired and large residual errors persisted.  
27 However, when learning relied solely on explicit strategy, both the adaptation limit and its dependence  
28 on perturbation variability disappeared. In contrast, when learning depended entirely, or in part on  
29 implicit learning, residual errors developed. Residual errors in implicit performance were caused by  
30 variance-dependent modifications to error sensitivity, not forgetting. These observations are consistent  
31 with a model of learning in which the implicit system becomes more sensitive to error when errors are  
32 consistent, but forgets this memory of errors over time. Thus, residual errors in motor adaptation are a  
33 signature of the implicit learning system, caused by an error sensitivity that depends on the history of  
34 past errors.

35

## 36 **Introduction**

37 During motor adaptation, perturbations alter the sensory consequences of motor commands, yielding  
38 sensory prediction errors. In humans and other animals, the brain learns from these errors and adjusts  
39 its motor commands on subsequent attempts. Over many trials, the adjustments accumulate, but  
40 surprisingly, adaptation often remains incomplete; even after extended periods of practice, residual  
41 errors persist in many behaviors including reaching<sup>1-4</sup>, saccades<sup>5,6</sup>, and walking<sup>7</sup>. Why does learning  
42 appear to stop despite the fact that errors remain?

43 Current models suggest that adaptation is supported by distinct learning systems: one implicit<sup>8</sup>,  
44 and the other explicit<sup>9-11</sup>. It is thought that the implicit system contributes little to modulation of  
45 asymptotic performance; when challenged with fixed errors, the implicit system appears to saturate at  
46 identical levels<sup>12,13</sup>. In contrast, explicit strategy provides greater flexibility; its asymptotic behavior is  
47 altered as people age<sup>14-16</sup>, under different types of feedback<sup>17</sup>, and with the time allotted for the  
48 preparation of a movement<sup>18</sup>. Therefore, current evidence suggests that the explicit system alone  
49 modifies the asymptotic state of learning.

50 Here we tested this view using stochastic perturbations that affected reaching movements. We  
51 found that when perturbation variability was high, residual errors increased<sup>19-21</sup>. Furthermore, when  
52 perturbation variability was increased mid-experiment, the asymptotic performance decreased, causing  
53 participants to lose what they had already learned. Thus, the asymptote of adaptation was not a hard  
54 limit, but a dynamic variable that depended on the second order statistics of the perturbation. Which  
55 adaptive system was responsible for limiting the adaptation process?

56 To answer this question we isolated implicit and explicit components of adaptation using several  
57 methodologies including verbal instructions, aim reporting<sup>9</sup>, limiting reaction time<sup>22-24</sup>, and delaying  
58 visual feedback<sup>25,26</sup>. Across all experiments there was a very consistent pattern; learning that relied  
59 solely on explicit strategy did not suffer from residual errors, and was not affected by perturbation  
60 variance. That is, in contrast to earlier findings, the asymptotic limit of adaptation was due to an  
61 inherent property of the implicit system, a property that depended on perturbation variance.

62 Why did the implicit system suffer from an inability to eliminate residual errors, and why did the  
63 impairment become greater when perturbation variance increased? Implicit adaptation is supported by

64 two competing processes, learning and forgetting<sup>27-30</sup>. Learning is controlled by sensitivity to error, and  
65 forgetting is controlled by the rate at which memory decays over time. When errors are large, learning  
66 dominates, yielding changes in motor commands that improve performance. However, as errors get  
67 small, forgetting reaches an equilibrium with error-based learning. Thus, in theory the asymptote of  
68 implicit adaptation could be a result of an equilibrium between forces that promote learning, and forces  
69 that promote forgetting<sup>17</sup>. Changes to either of these underlying processes could in principle alter the  
70 total extent of implicit adaptation.

71 By measuring patterns of forgetting and trial-by-trial learning, we found that changes in the  
72 asymptote of implicit learning were achieved solely through modulation of its error sensitivity.  
73 Furthermore, the spatiotemporal properties of error sensitivity suggested that the brain updated its  
74 implicit learning processes according to the sequence of past errors<sup>31</sup>. When errors of a particular size  
75 were consistent, the brain increased its sensitivity to those errors. Furthermore, like adapted behavior,  
76 this memory of error consistency appeared to be limited by decay. The resulting model of implicit  
77 learning accounted not only for changes in the asymptotic extent of adaptation induced by stochastic  
78 perturbations<sup>19-21</sup>, but also the saturation of learning under error-clamp conditions<sup>6</sup>, and the dissolution  
79 of savings over time<sup>32,33</sup>. Overall, we report that the asymptotic limit of motor adaptation has a simple  
80 cause; the implicit system has an error sensitivity that is modulated by the history of past errors.

81

## 82 Results

83 In an earlier study, Fernandes and colleagues<sup>19</sup> exposed participants to variable visuomotor rotations  
84 (Fig. 1A, Rotation). All groups were exposed to a sequence of perturbations that had the same mean  
85 (30°), but different amounts of variability; one group experienced a constant perturbation of 30° (zero  
86 variance), while the other two groups experienced perturbations with low variance or high variance (Fig.  
87 1B, top). At the end of training, reach angles in each group had saturated, but still yielded persistent  
88 residual errors. Curiously, residual errors increased with the variance of the perturbation (Fig. 1H,  
89 Fernandes, median residual error on last 10 trials; repeated measures ANOVA:  $F(2,14)=17.8$ ,  $p<0.001$ ,  
90  $\eta_p^2=0.54$ ). Why did perturbation variance reduce the total extent of adaptation?

91 To answer this question, we repeated the experiments of Fernandes and colleagues<sup>19</sup>, but with  
92 an important difference. In that earlier work, all three perturbation conditions were experienced by the  
93 same participants, raising the possibility that prior exposure to the visuomotor rotation could have  
94 altered subsequent learning in the other environments<sup>31,34,35</sup>. To avoid this possibility, we recruited  
95 different sets of participants for each perturbation condition.

96 In our experiments, participants held the handle of a robotic arm (Fig. 1A) and reached in a two-  
97 dimensional workspace. In Experiment 1, we introduced a visual perturbation and divided the  
98 participants into two groups: a zero-variance group ( $n=19$ ) in which the perturbation magnitude  
99 remained invariant at 30° (Fig. 1C, black), and a high-variance group ( $n=14$ ) in which the perturbation  
100 was sampled on each trial from a normal distribution with a mean of 30° and standard deviation of 12°  
101 (Fig. 1C, red). Our results confirmed the earlier observation; participants in the zero-variance group  
102 learned more than the high-variance group (Fig. 1C, bottom; Fig. 1H, Exp. 1, mean error on last 10  
103 epochs, two-sample t-test,  $p=0.002$ ; Cohen's  $d=1.49$ ).

104 In Experiment 2, we tested the generality of this observation by measuring how participants  
105 responded to variability in force field perturbations (Fig. 1A, Force field). As before, we divided the

106 participants into two groups, a zero-variance group (n=12) in which the perturbation magnitude  
107 remained constant at 14 N·sec/m (Fig. 1D, top, black), and a high-variance group (n=13) in which the  
108 perturbation magnitude was sampled on each trial from a normal distribution with mean 14 N·sec/m  
109 and standard deviation of 6 N·sec/m (Fig. 1D, top, red). To track the learning process, we intermittently  
110 measured reach forces during channel trials<sup>36</sup> (Fig. 1A, channel). As in visuomotor adaptation, variance  
111 in the force field perturbation reduced the total amount of learning (Fig. 1D, bottom; Fig. 1H, Exp. 2,  
112 mean error on last 5 epochs; two-sample t-test,  $p=0.001$ ; Cohen's  $d=1.46$ ). Thus, perturbation variability  
113 altered the extent of adaptation across various modalities of adaptation.

114

#### 115 *Perturbation variance limited the total extent of adaptation*

116 An examination of the late stage of training (Figs. 1B-D, bottom) raises the concern that adaptation had  
117 not completely saturated; perhaps with additional exposure, adaptation might converge across variance  
118 conditions, even eliminating the residual errors. To examine this possibility, we repeated Experiment 1,  
119 but this time more than doubled the number of training trials (Fig. 1E). Addition of these trials allowed  
120 performance to saturate, as evidenced by the slope of the reach angles (Fig. 1G, slope of the line fit to  
121 individual performance over the last 50 epochs was not different than zero;  $p=0.71$  and  $p=0.83$  for the  
122 low and high-variance groups). Notably, despite extended training, residual errors persisted (Fig. 1H,  
123 Exp. 3, residual errors  $\pm$  SD on last 50 epochs; zero-variance:  $1.7 \pm 0.9^\circ$ ; high-variance:  $8.7 \pm 1.7^\circ$ ; t-test  
124 against zero; both groups,  $p<0.001$ ). We again found that high perturbation variance coincided with an  
125 increase in residual error (Fig. 1H, Exp. 3; two-sample t-test,  $p<0.001$ ; Cohen's  $d=5.24$ ).

126 Did perturbation variability causally alter asymptotic performance? If so, we reasoned that we  
127 could switch between two different asymptotic states by changing the perturbation variance mid-  
128 experiment. To test this prediction, in Experiment 4 participants (n=14) first adapted to a zero-variance  
129  $30^\circ$  visuomotor perturbation (Fig. 1F, black). With training, performance approached a plateau. We next  
130 increased the perturbation variance (while keeping the mean constant) by sampling from a normal  
131 distribution with a standard deviation of  $12^\circ$  (Fig. 1F, red). As the perturbation variance increased, reach  
132 angles decreased (Fig. 1H, Exp. 4, mean residual error on last 10 epochs; two-sample t-test,  $p=0.005$ ;  
133 Cohen's  $d=1.16$ ). Thus, despite having already learned to compensate for much of the perturbation,  
134 when perturbation variance increased, residual error increased in every subject (Fig. 1H, Exp. 4).

135 Together, Experiments 1-4 demonstrated that despite extended practice, motor adaptation  
136 suffered from an asymptotic limit, resulting in persistent errors. However, this asymptotic limit was  
137 dynamic, responding to the second order statistics of the perturbation.

138

#### 139 *Residual errors were a property of the implicit learning system*

140 While reach adaptation can occur despite severe damage to the explicit, conscious learning system of  
141 the brain<sup>8</sup>, under normal circumstances performance benefits from both implicit and explicit learning  
142 systems<sup>10,11,37,38</sup>. Therefore, in principle, the residual errors might be due to limitations in implicit  
143 learning, explicit learning, or both. To explore this question, we performed a series of experiments that  
144 isolated each learning system and measured the effects of perturbation variance on performance.

145 To isolate the explicit learning system we used a well-documented approach: delayed feedback  
146 <sup>25,26,39,40</sup>. We removed all visual feedback during the movement itself, and only presented the terminal  
147 endpoint of the cursor to the participant at a delay of 1 second following movement completion

148 (Experiment 5). This feedback delay is thought to impair implicit learning, at least in part by delaying  
149 olivary input to the cerebellar cortex well beyond a plasticity window that peaks at approximately 120  
150 ms<sup>41,42</sup>. As in Experiment 1, we tested participants using perturbations with zero variance and high  
151 variance (Fig. 2A). We found that in both groups the increased feedback delay accelerated the learning  
152 rate, consistent with the rapid expression of aiming strategies (Fig. 2A, bottom left and right panels).  
153 Furthermore, the reaction times greatly increased in all periods of the experiment (Figs. 2A and 2B,  
154 bottom). Remarkably, now the subjects compensated perfectly for the mean perturbation and were  
155 able to eliminate the residual errors (Fig. 2B, t-test against zero,  $p=0.512$  for zero-variance and  $p=0.978$   
156 for high-variance). Furthermore, in contrast to all prior experiments (Fig. 1), perturbation variability did  
157 not have any measurable effects on asymptotic performance (Fig. 2B, bottom). That is, at the end of  
158 training, there was no difference in residual error among the zero and high variance groups (Fig. 2B, bar  
159 graph, paired t-test,  $p=0.522$ ). Thus, reach adaptation that putatively relied on explicit learning did not  
160 exhibit residual errors, and was not affected by perturbation variance.

161 This hints that variation in residual errors (Fig. 1) may be due to properties of the implicit  
162 learning system. To explore this possibility, we isolated implicit adaptation by severely limiting the time  
163 that participants were given to initiate their movement<sup>22,23,43,44</sup>. We did this by imposing a strict upper  
164 bound on reaction time and systematically training participants to reach at very low latencies  
165 (Experiment 6). As before, we divided participants into two groups: a zero-variance group ( $n=13$ ) and a  
166 high-variance group ( $n=12$ ) with perturbation statistics identical to that of Experiment 1.

167 Under normal condition in which there was no constraint on reaction time, introduction of the  
168 perturbation led to a dramatic increase in reaction time (Fig. 2C bottom panel, control); participants  
169 nearly doubled their preparation time, potentially signaling the expression of explicit strategies. In  
170 contrast, in the constrained reaction time group, subjects executed their reach at considerably lower  
171 latencies (Fig. 2C bottom panel, limit rxn). In this group, the time required for movement preparation  
172 remained roughly constant throughout the experiment, even after the introduction of the perturbation.

173 As expected, limiting reaction time impaired adaptation. In the zero-variance (Fig. 2C, left panel)  
174 and high-variance conditions (Fig. 2C, right panel), performance at short reaction times was stunted  
175 relative to control (two-sample t-test on last 10 epochs;  $p=0.041$  and  $p=0.007$  for zero and high-  
176 variance; Cohen's  $d=0.77$  and  $1.17$  for zero and high-variance), consistent with the removal of explicit  
177 aiming strategies. Critically, the residual errors expressed by the isolated implicit system were clearly  
178 affected by increased perturbation variance (Fig. 2D); the total extent of learning was reduced by  
179 approximately  $5^\circ$  (Fig. 2D, bar graph, difference in residual errors during the last 10 epochs, two-sample  
180 t-test,  $p<0.001$ , Cohen's  $d=1.53$ ). Thus, whereas perturbation variance did not affect the explicit system,  
181 it severely impaired the implicit system.

182 Under normal circumstances both the implicit and explicit systems contribute to adaptation.  
183 This is illustrated schematically in Fig. 2E (left subplot); when a target is presented, explicit-based  
184 learning rotates the target by some amount, and the implicit system provides a subconscious  
185 recalibration, resulting in the eventual reach angle. Our results in Fig. 2B suggest that perturbation  
186 variance does not affect the explicit system. If this is true, then during normal adaptation in which both  
187 implicit and explicit systems contribute to learning, assay of implicit and explicit contributions should  
188 show that perturbation variance impairs only the implicit component, not explicit strategy.

189 We tested this prediction by performing a control experiment (Experiment 7). Participants were  
190 divided into two groups (zero-variance,  $n=9$ , and high-variance,  $n=9$ ) and experienced perturbations  
191 with statistics matching those of Experiment 1. As expected, the addition of perturbation variance  
192 reduced the total extent of adaptation (Fig. 2F, also shown in Fig. 2G, no instruct mean residual error  
193 over last 10 epochs; two-sample t-test,  $p<0.001$ , Cohen's  $d=1.91$ ). To determine if these differences in  
194 performance were caused by the effect of perturbation variance on the implicit system, explicit system,  
195 or both, we conducted two assays at the end of the training period. First, we verbally instructed  
196 participants that the cursor would be removed on the next several trials, and their goal was to move  
197 their hand straight through the target, without trying to compensate for any rotation that they had  
198 experienced (Fig. 2E, verbal instruction). Such an instruction eliminates explicit aiming, thus isolating the  
199 amount of implicit adaptation<sup>12,13</sup> (Fig. 2F, gray region). By subtracting this implicit angle from the reach  
200 angle measured prior to the verbal instruction, we also estimated the extent to which participants were  
201 explicitly aiming their reach angle at the end of the adaptation period. We found that in the high-  
202 variance condition, the implicit system had learned less than in the zero-variance condition (Fig. 2G,  
203 implicit instruct, two-sample t-test,  $p=0.023$ , Cohen's  $d=1.19$ ). In contrast, explicit aiming was unaltered  
204 by perturbation variance (Fig. 2G, explicit, instruct, two-sample t-test,  $p=0.69$ ), thus confirming the  
205 results in Fig. 2B. That is, perturbation variance appeared to impair only the implicit system.

206 Next, we followed the implicit probe with another assay to measure explicit aiming. Participants  
207 were shown a target as well as a ring of small dots each labeled with an alphanumeric string (Fig. 2E,  
208 self-report). At the end of the perturbation period we asked them to report the angle toward which they  
209 aimed their hand (using the small dots as a guide). We again found that perturbation variance had no  
210 effect on explicit aiming (Fig. 2G, explicit clock, two-sample t-test,  $p=0.45$ ).

211 In summary, when learning relied mainly on the explicit system, performance did not suffer  
212 from residual errors (Fig. 2A), and was unaffected by perturbation variability. In contrast, when learning  
213 relied mainly on the implicit system, performance exhibited residual errors, and was strongly affected by  
214 perturbation variability (Fig. 2C). When the two-learning system operated together, perturbation  
215 variance affected only the implicit system (Fig. 2G). Thus, change in residual error appeared to be caused  
216 by properties of the implicit system, properties that were sensitive to the second order statistics of the  
217 perturbation.

### 218 *Perturbation variance reduced error sensitivity, but not forgetting rates*

219 Why does the implicit system exhibit an inability to completely eliminate performance errors, and why is  
220 this impairment exacerbated by perturbation variance? In principle, steady-state errors arise because  
221 this impairment exacerbated by perturbation variance? In principle, steady-state errors arise because  
222 performance is driven by an interaction between two opposing forces, error-based learning, and trial-to-  
223 trial forgetting<sup>17,27-30</sup> (Fig. 3A). In this model, performance saturates because as training progresses,  
224 errors which drive the learning process become small enough that there is a balance between forgetting  
225 and learning (see *Methods*). At this stage learning appears to stop, even though residual errors remain.  
226 Perturbation variance might have affected forgetting rates, or error sensitivity (Fig. 3B and 3C). The  
227 implicit system learns with error sensitivity  $b_i$ , and exhibits trial-to-trial retention specified by  $a_i$ .  
228 Similarly, the explicit system learns with error sensitivity  $b_e$ , and exhibits trial-to-trial retention specified  
229 by  $a_e$ . Does perturbation variance affect error sensitivity, forgetting, or both?

230 First, we consider explicit adaptation. Because explicit strategies did not exhibit residual errors  
231 in either the zero-variance and high-variance environments (Fig. 2B), we can infer that the explicit  
232 system does not suffer from trial-to-trial forgetting. In the state-space framework, this implies that  $a_e \approx 1$   
233 irrespective of perturbation variability (see *Methods*). Did perturbation variance affect error sensitivity  
234 of the explicit system? To answer this question, we examined the data in Exp. 5 and found that the  
235 learning rate was not different among the groups that learned with zero or high perturbation variance  
236 (Fig. 3D, paired t-test,  $p=0.715$ ). These results suggest that for the explicit system, both trial-to-trial  
237 forgetting and error sensitivity are unaltered by perturbation variance.

238 We next focused on the implicit system and began by estimating the forgetting rate of each  
239 participant in the error-free movement period at the end of each experiment (gray region in Figs. 1C, 1D,  
240 1F). During these periods, behavior naturally decayed towards the baseline (Fig. 3E), thus providing a  
241 way to isolate the rate of trial-by-trial forgetting (i.e., the rate of decay of behavior). Interestingly, we  
242 found that in all experiments, the rate of forgetting was unchanged by perturbation variability (Fig. 3E,  
243 two-sample t-test; Exp. 1,  $p=0.72$ ; Exp. 2,  $p=0.19$ ; Exp. 6,  $p=0.79$ ). Critically, when we isolated the implicit  
244 system, the rate of forgetting was unaffected by perturbation variance (Exp. 6, Figs. 3E and 3F).  
245 Therefore, perturbation variance did not affect the forgetting rate in the implicit system.

246 Next, we empirically estimated error sensitivity in the various experiments. To do this, we  
247 calculated the difference between the reach angle in pairs of consecutive trials (adjusting for forgetting)  
248 and divided this by the error experienced on the first of the two trials. By definition, this quotient  
249 represents one's sensitivity to error, i.e., the fraction of the error that is compensated for on the next  
250 trial. In sharp contrast to forgetting rates, we found consistent differences in error sensitivity between  
251 the zero and high perturbation variance groups; in all experiments, participants in the zero-variance  
252 groups exhibited an error sensitivity nearly twice that of individuals in the high-variance groups (Fig. 3G:  
253 two-sample t-test; Exp. 1,  $p=0.002$ , Cohen's  $d=1.18$ ; Exp. 2,  $p=0.039$ , Cohen's  $d=0.87$ ; Exp. 4,  $p=0.006$ ,  
254 Cohen's  $d=1.12$ ; Exp. 6,  $p=0.016$ , Cohen's  $d=1.05$ ). Importantly, when we isolated the implicit system,  
255 error sensitivity was significantly reduced by variance (Fig. 3G).

256 In summary, perturbation variance had no effect on the explicit system, but reduced error  
257 sensitivity of the implicit system. This suggests that residual errors increased with high-variance  
258 perturbations because the variance somehow reduced the error sensitivity of the implicit system.

259

### 260 *Perturbation variance reduced the ability to learn from small errors, not large errors*

261 Our quantification of error sensitivity in Fig. 3G made the assumption that the brain is equally sensitive  
262 to errors of all sizes. However, it is well-documented that error sensitivity varies with the magnitude of  
263 error; one tends to learn proportionally more from small errors<sup>12,13,46,47</sup>. In other words, error sensitivity  
264 is not constant, but declines as error size increases. How did perturbation variance alter the functional  
265 relationship between error magnitude and sensitivity to error?

266 To answer this question, we re-estimated error sensitivity, but this time controlled for the  
267 magnitude of error. We placed pairs of consecutive movements into bins according to the error  
268 experienced on the first trial, and then calculated error sensitivity within each bin. As expected, in both  
269 zero-variance and high-variance conditions, as error size increased, error sensitivity decreased (Fig. 4A,  
270 left; mixed-ANOVA, within-subjects effect of error size,  $F=22.1$ ,  $p<0.001$ ,  $\eta_p^2=0.21$ ). This confirmed that  
271 indeed, people tended to learn proportionally less from larger errors. However, for a given error size,

272 the high-variance perturbation group exhibited lower error sensitivity than the zero-variance group (Fig.  
273 4A, left; mixed-ANOVA, between-subjects effect of perturbation variance,  $F=14.7$ ,  $p<0.001$ ,  $\eta_p^2=0.15$ ).

274 This analysis revealed an interesting pattern; increased perturbation variance reduced the ability  
275 to learn from small errors ( $<20^\circ$ ), but had no effect on the ability to learn from larger errors ( $>20^\circ$ ) (Fig.  
276 4A left; post-hoc testing with t-test adjusted with Bonferroni correction,  $p<0.001$  and Cohen's  $d=0.72$  for  
277  $5-14^\circ$ ,  $p<0.001$  and Cohen's  $d=0.79$  for  $14-22^\circ$ , and  $p=0.53$  for  $12-30^\circ$ ). Why should increases in  
278 perturbation variance selectively affect learning from smaller errors, but not larger errors?  
279

### 280 *The spatial pattern of error sensitivity follows the consistency of error*

281 A model of sensorimotor adaptation<sup>31</sup> posits that the brain adjusts its sensitivity to error in response to  
282 the consistency of past errors. In this memory of errors model, when the error on trial  $n$  has the same  
283 sign as the error on trial  $n+1$ , it signals that the brain has undercompensated for error on trial  $n$ , and so  
284 should increase sensitivity to that error (Fig. 4B, left). Conversely, when the errors in two consecutive  
285 trials differ in sign, the brain has overcompensated for the first error, and so should decrease sensitivity  
286 to that error (Fig. 4B, right). These changes in error sensitivity occur locally, meaning that the brain can  
287 simultaneously increase sensitivity to one error size, while decreasing sensitivity to another<sup>31</sup>. Thus, in  
288 the context of a variable perturbation, the memory of errors model provides an interesting prediction;  
289 perturbation variance alters the consistency of errors, producing less consistency for some error sizes  
290 (smaller ones) but not others (larger ones).

291 We tested this idea by quantifying consistency of error as a function of its size. Indeed, we found  
292 that in the high-variance group there was a higher probability of experiencing an inconsistent error (Figs.  
293 4C; Exps. 1, 3, & 7,  $p=0.029$ , Cohen's  $d=0.53$ ; Exp. 2,  $p<0.001$ , Cohen's  $d=2.84$ ; Exp. 4,  $p<0.001$ , Cohen's  
294  $d=2.22$ ; Exp. 5,  $p=0.031$ ,  $d=0.90$ ; Exp. 6,  $p=0.048$ , Cohen's  $d=0.84$ ). Moreover, when we binned the data  
295 based on error size, the differences in the relative number of consistent and inconsistent errors  
296 exhibited a striking pattern that mirrored error sensitivity patterns (Fig. 4A, right; mixed-ANOVA,  
297 between-subjects effect of perturbation variance,  $F=60.5$ ,  $p<0.001$ ,  $\eta_p^2=0.42$ ; within-subjects effect of  
298 error size,  $F=54.4$ ,  $p<0.001$ ,  $\eta_p^2=0.39$ ). For smaller errors, the zero-variance group had more consistent  
299 error events and fewer inconsistent error events than the high-variance group (Fig. 4A, right; post-hoc  
300 testing with t-test adjusted with Bonferroni correction,  $p<0.001$  and Cohen's  $d=1.83$  for  $5-14^\circ$ ,  $p<0.001$   
301 and Cohen's  $d=0.85$  for  $14-22^\circ$ ). However, for large errors, there was no difference in the relative  
302 consistency (Fig. 4A, right; post-hoc testing with t-test adjusted with Bonferroni correction,  $p=0.16$ ).

303 In summary, as perturbation variance increased, there was a reduction in the trial-to-trial  
304 consistency of small errors, but not large errors (Fig. 4A, right). Coincident with these changes in the  
305 history of errors, there was a reduction in the error sensitivity for small errors, but not large errors (Fig.  
306 4A, left). These results raised the possibility that changes in error sensitivity in the implicit system (Fig.  
307 3G) were due to the history of errors that each participant had experienced throughout training. To  
308 explore this question, we further analyzed the data in the framework of the memory of errors model.  
309

### 310 *The temporal pattern of error sensitivity follows the consistency of error*

311 The memory of errors model<sup>31</sup> posits that error sensitivity changes during training as a function of the  
312 specific sequence of errors that each participant has experienced:



313 
$$\Delta \mathbf{b}^{(n+1)} = \alpha \Delta \mathbf{b}^{(n)} + \beta \text{sign}(e^{(n)} e^{(n-1)}) \mathbf{c}(e^{(n-1)}) \quad (1)$$

314 Here,  $\Delta \mathbf{b}$  is a vector whose elements represent the change in error sensitivity within different patches of  
315 the error space (5° bins spaced evenly between errors of -100° and 100°). Eq. (1) describes changes in  
316 error sensitivity in terms of two forces: learning and decay. Learning is encapsulated in the right-most  
317 term, which increases error sensitivity when consecutive errors are consistent. The rate of this increase  
318 is determined by the parameter  $\beta$ . Error sensitivity increases only for error sizes close to the error  
319 experienced on the first of the two consecutive trials (controlled by the vector  $\mathbf{c}$ , see *Methods*). Decay is  
320 encapsulated by the parameter  $\alpha$ , which like the retention factor (Fig. 3F), determines how strongly the  
321 memory of past errors is retained from one trial to the next.

322 We focused on Exp. 6 where we isolated implicit learning. For each participant, we used their  
323 actual sequence of errors to predict how error sensitivity should vary for a given error size throughout  
324 training. When variability was added to the perturbation (Fig. 4D), this changed the statistics of error  
325 (Fig. 4E, Step 1 in Fig. 4H). The error distribution widened (i.e., became more variable; Fig. 4C, Exp. 6, SD  
326 of errors, two-sample t-test,  $p < 0.001$ , Cohen's  $d = 1.55$ ), and also exhibited an increased probability of  
327 experiencing inconsistent errors (Fig. 4C, Exp. 6, left, two-sample t-test,  $p = 0.048$ , Cohen's  $d = 0.84$ ).  
328 Because of these changes in the underlying error distribution, Eq. (1) predicted that implicit error  
329 sensitivity should diverge over time in the zero-variance and high-variance environments (blue curves in  
330 Fig. 4F, Step 2 in Fig. 4H). Finally, because in the high-variance group the implicit error sensitivity  
331 saturated prematurely, the process of error-based learning was suppressed, thereby reducing the total  
332 extent of implicit adaptation (Fig. 4G, Step 3 in Fig. 4H). The cascade of these processes predicted  
333 behavior that closely matched the observed reach angles (Fig. 4G).

334 The model made the unexpected prediction that error sensitivity should increase during  
335 training, but at a slower rate for the high-variance group (Fig. 4F, blue curves). Despite high perturbation  
336 variance, the experience of consistent errors (Fig. 4B, left) remained more probable than inconsistent  
337 errors (Fig. 4C, Exp. 6, left). Therefore, Eq. (1) made the surprising prediction that error sensitivity should  
338 increase in both the zero-variance and the high-variance environments, but less so in the high-variance  
339 case (Fig. 4F; Fig. 4J, model).

340 To test for this, we empirically calculated implicit error sensitivity as a function of trial in the  
341 zero-variance and the high-variance groups. Critically, we found that implicit error sensitivity started at  
342 similar levels in the zero-variance and high-variance environments (two-sample t-test on error sensitivity  
343 over first 10 epochs,  $p = 0.20$ ), but diverged over time (Fig. 4I). Both of these predictions matched the  
344 observed implicit time courses (Fig. 4J, data). Implicit error sensitivity increased during exposure to the  
345 zero-variance perturbation (Fig. 4J, zero var., left bar; paired t-test,  $p = 0.006$ , Cohen's  $d = 0.93$ ), and  
346 during the high-variance perturbation (Fig. 4J, high var., left bar; paired t-test,  $p < 0.001$ , Cohen's  $d = 2.21$ ).  
347 However, the growth rate was stunted in the high-variance group relative to the zero-variance group  
348 (Fig. 4J, compare left bars in zero var. and high var.; two-sample t-test,  $p = 0.025$ , Cohen's  $d = 0.96$ ).

349 In summary, our model predicted that implicit error sensitivity should increase in response to  
350 the more consistent history of errors in the zero-variance perturbation condition. It also predicted that  
351 introducing variance into the perturbation should not decrease implicit error sensitivity, but rather stunt  
352 its growth. Our measurements confirmed both of these predictions. Thus, the implicit process of

353 adaptation behaved in a manner consistent with an error sensitivity that depended on a decaying  
354 history of past errors.

355

### 356 *Generality of the model and its predictions*

357 Our model makes the general prediction that the specific sequence of errors that the subject  
358 experiences affects the error sensitivity of the implicit system, which in turn produces an inability to  
359 eliminate residual errors. To test the generality of this prediction, we considered two important data  
360 sets in another implicit learning paradigm: non-zero error-clamp condition and dissolution of savings  
361 during saccade adaptation.

362 Robinson and colleagues<sup>6</sup> adapted monkeys to a saccadic perturbation in which the error on  
363 every trial was fixed to  $-1^\circ$  independent of the monkey's motor output (Fig. 5A, top). Critically, despite  
364 the fact that error never changed, performance nevertheless reached a saturation point (Fig. 5A,  
365 middle). We simulated Eq. (1) and found a similar behavior: despite complete error consistency, the  
366 presence of decay ( $\alpha < 1$ ) caused error sensitivity to saturate over time (Fig. 5A, bottom). Because error  
367 sensitivity saturated, so too did behavior (Fig. 5A, middle). In contrast, if decay was not present ( $\alpha = 1$ ),  
368 error-sensitivity grew unbounded, and model predictions did not match the data. Therefore, the  
369 memory of errors model exhibits saturation in performance during non-zero error-clamp conditions, but  
370 only if there is decay in the memory of errors.

371 Finally, we considered a classic experiment that demonstrated savings, but only if the block of  
372 re-exposure was temporally close to the block of original exposure, and not if the two were separated  
373 by a long washout period. Kojima and colleagues<sup>32</sup> exposed monkeys to a  $3.5^\circ$  visual perturbation, then  
374 a  $-3.5^\circ$  perturbation, followed by re-exposure to the original  $3.5^\circ$  perturbation (Fig. 5B, no zero-error  
375 period, top). This paradigm elicited savings, i.e., a faster rate of re-learning<sup>29,31,48,49</sup> (Fig. 5B, middle;  
376 compare initial rates of learning denoted by the linear fits). However, when a long period of washout (no  
377 perturbation trials), savings was abolished (Fig. 5C, middle; compare initial rates of learning denoted by  
378 the linear fits). We simulated the behavior predicted by Eq. (1) and found that when the number of trials  
379 between initial exposure and re-exposure was short (Fig. 5B), the model predicted increased error  
380 sensitivity during the re-exposure period, correctly producing savings (Fig. 5B, bottom; compare P1 and  
381 P2). However, when the temporal distance was long, the model now predicted no savings upon re-  
382 exposure, but only when the memory of errors experienced decay. Therefore, to account for the  
383 dissolution of savings, the memory of errors model must decay over time.

384 In summary, Eq. (1) captures an important duality between the adaptation of behavior and the  
385 adaptation of error sensitivity; the dynamics of each are controlled by a competition between learning  
386 and forgetting. A decaying memory of errors model not only accounted for the implicit response to  
387 variable perturbations (Fig. 4), but also the saturation of learning observed in error-clamp<sup>4</sup>, and the  
388 dissolution of savings over long error-free periods<sup>5,9</sup>.

389

### 390 **Discussion**

391 Across numerous paradigms, adaptation exhibits a consistent property; even after prolonged training,  
392 learning appears to stop, leaving behind residual errors<sup>2,4,5,7</sup>. Curiously, residual errors depend on the  
393 second order statistics of the perturbation; perturbation variance increases residual errors, seemingly  
394 impairing adaptation. Here, we find that residual errors are a feature of behavior that arises from the

395 implicit learning system; when reach adaptation depends solely on the explicit system, behavior does  
396 not exhibit residual errors. The reason why the implicit system exhibits residual errors is because its  
397 error sensitivity depends on the history of errors that the subject has experienced. When perturbation  
398 variance is low, errors are temporally consistent, resulting in an increase in the error sensitivity of the  
399 implicit system. When perturbation variance is high, errors are temporally inconsistent, causing error  
400 sensitivity to rise more slowly in the implicit system. Eventually these up-regulations in error sensitivity  
401 strike an equilibrium with forgetting, causing performance to saturate and produce residual errors that  
402 cannot be eliminated. Thus, residual errors are a limitation of behavior that arises because the implicit  
403 learning system has an error sensitivity that varies with the history of past errors.

404

#### 405 *A memory of errors in implicit learning*

406 Motor adaptation is supported by both implicit and explicit systems<sup>8,10,11,37,38</sup>. With the exception of one  
407 report<sup>50</sup>, most if not all previous studies<sup>43,51–55</sup> have suggested that the implicit system is inflexible, has a  
408 response to error that does not change with training, and saturates at levels that are identical across  
409 perturbations<sup>56</sup> or error sizes<sup>12,13</sup>.

410 Our results alter these prevailing views. Using various techniques such as direct verbal  
411 instruction<sup>12,13</sup>, reports of explicit aiming angles<sup>9</sup>, limiting movement preparation time<sup>22,23,43,44</sup>, and  
412 delaying visual feedback<sup>25,26,39,40</sup>, we found substantial evidence that implicit learning is flexible; its error  
413 sensitivity is modulated by the history of past errors. Specifically, both our model and empirical  
414 measurements demonstrated that implicit error sensitivity tends to increase with exposure to a  
415 perturbation, even when this perturbation is highly variable. In other words, the effect of perturbation  
416 variability is not to reduce error sensitivity, but to limit its potential growth. We expect that under  
417 natural circumstances, variability in disturbances, the production of a movement, and the process of  
418 learning from error<sup>57</sup>, all contribute to the amount of change in implicit error sensitivity and thus the  
419 asymptotic behavior of implicit learning.

420

#### 421 *Asymptotic behavior of explicit strategies*

422 In contrast to implicit learning, we found that perturbation variability had no effect on explicit strategy,  
423 neither decreasing the explicit rate of learning (Fig. 3D), nor its asymptotic performance (Fig. 2D). With  
424 that said, many other studies have documented considerable flexibility in the expression of explicit  
425 strategy. For example, explicit processes are known to strongly contribute to savings, at least in the  
426 context of visuomotor rotation<sup>43,52</sup>. In addition, age-related declines in explicit learning<sup>14,15</sup> lead to  
427 deficits in the total extent of adaptation<sup>16</sup>. Furthermore, manipulations to visual feedback recruit explicit  
428 reinforcement learning mechanisms that modulate asymptotic behavior<sup>17</sup>.

429 Here we found that adding variability to a visual perturbation did not alter the dynamics of  
430 explicit learning. However, a recent report<sup>54</sup> demonstrated that when environmental consistency is  
431 added via a random walk, the rate of explicit learning, but not implicit learning, increases. Apparent  
432 discrepancies between these observations may relate to methodological differences. In the earlier  
433 report, endpoint feedback was provided at delays ranging from 600-2500ms, whereas in our work,  
434 participants were provided continuous feedback of the cursor with no added delay (excepting Exp. 5).  
435 Therefore, we might expect that this earlier report used conditions that more strongly engaged explicit  
436 systems and hindered implicit learning<sup>26,40–42</sup>.

437 In general, methodological differences across the literature<sup>45</sup> make it challenging to understand  
438 the context-dependent nature by which explicit strategies contribute to asymptotic performance. In  
439 some cases, explicit learning reaches a peak early in training, and then declines with further training<sup>9</sup>,  
440 reminiscent of a learning system with incomplete retention. Here we found that the explicit system is  
441 capable of complete elimination of residual errors, exhibiting no trial-based forgetting (Exp. 5). Even  
442 though explicit systems are capable of completely compensating for error (Exp. 5), under normal  
443 conditions they do not do so (Exps. 1-4,7). This observation might partially be explained by a recent  
444 report<sup>18</sup> which demonstrates that explicit systems can eliminate residual errors when preparation time  
445 is prolonged. Such an interpretation would be consistent with the increased reaction times exhibited in  
446 Exp. 5.

447 In summary, our data support the inclusive view that both implicit and explicit processes change  
448 their response to error, and together determine the total extent of sensorimotor adaptation.

449  
450 *Alternate mechanisms that limit implicit adaptation*

451 Curiously, our conclusions run somewhat counter to recent reports that have engaged implicit systems  
452 with invariant target-cursor errors (i.e., constant error-clamp)<sup>12,13</sup>. While we observed fluidity in the  
453 extent of implicit adaptation, implicit processes appear to reach similar asymptotic levels when they are  
454 driven by fixed errors between the target and cursor. It may be that the total extent of implicit  
455 adaptation is limited by an external ceiling in correction that is reached when errors are completely  
456 consistent from one trial to the next. But in traditional cases where the consistency of error (Fig. 4B)  
457 decreases as adaptation nears its asymptote (thus halting increases in error sensitivity), mechanisms of  
458 decay and error-based learning together control the terminal amount of implicit learning.

459 With that said, it should be noted that there are fundamental differences in the error signals  
460 that drive learning in the traditional rotation paradigm used in this study, versus those that employ an  
461 invariant error-clamp condition. Implicit systems appear to learn from both hand-cursor error<sup>37</sup>, as well  
462 as target-cursor error<sup>24</sup>. In traditional rotation paradigms, the hand-cursor error is constant over time,  
463 but the target-cursor error (i.e., task error) decreases over time. In constant error-clamp paradigms<sup>12,13</sup>,  
464 the hand-cursor error increases over time, but the target-cursor error remains constant over time. Given  
465 these fundamental differences in error signals, it is possible that different rotation paradigms engage  
466 different implicit systems. For example, back-of-the-envelope calculations (see *Methods*) indicate that  
467 the asymptotic level of implicit learning measured in the constant-clamp paradigm is considerably more  
468 variable than that measured under reaction time restrictions in Experiment 6; the standard deviation  
469 across participants was ~300% greater at asymptote for constant-error clamp<sup>13</sup> versus the limited  
470 reaction time condition. It seems unlikely that implicit recalibrations are driven by the same system  
471 across each of these tasks.

472 Finally, it may be that proprioception plays a role in limiting the extent of implicit recalibration,  
473 as noted in these earlier studies<sup>13</sup>. In the constant error-clamp condition, the proprioceptive mismatch  
474 between the cursor location and the hand position increases as the participant adapts to the  
475 perturbation. In traditional adaptation paradigms, this proprioceptive error is fixed. It may be the case  
476 that these proprioceptive signals play a modulatory role in limiting the total amount of implicit  
477 recalibration in the context of visuomotor adaptation.

478

479 *The extent of adaptation is altered by a decaying memory of errors*

480 While many studies have shown that one's rate of learning<sup>58,59</sup> can be altered in numerous contexts such  
481 as savings<sup>7,29,31,32,34,48,49</sup>, meta-learning<sup>31,48</sup>, and anterograde interference<sup>60</sup>, we know comparatively little  
482 about how the brain controls the total amount of adaptation achieved with prolonged exposures to a  
483 perturbation. State-space models of learning<sup>27,61</sup> predict that asymptotic levels of performance are set  
484 by the balancing of learning and forgetting<sup>17,62</sup>. Here, we found evidence that error sensitivity is also  
485 maintained by the same two processes (Fig. 5).

486 In our model (Eq. 1) error sensitivity exhibits both consistency-driven modulation as well as trial-  
487 based decay. That is, a memory of past errors is both acquired and forgotten over time. The original  
488 model<sup>31</sup> only considered the process of acquisition, not decay. Without decay, it is not possible to  
489 account for residual errors. Decay of error sensitivity is evident in the learned response to constant  
490 error-clamp conditions<sup>6,12,13,64,65</sup>. When subjects are exposed to the same error time and time again, the  
491 decay-free memory of errors model increases error sensitivity without bound (Fig. 5B). Instead, a  
492 decaying memory of errors reaches saturation in error sensitivity, and thus produces residual errors.

493 Consider also the fact that the total extent of learning is often similar during the first and second  
494 exposures to a perturbation, even though learning is faster during the second exposure<sup>29,33,66</sup>. Why are  
495 residual errors equal, if error sensitivity is higher upon re-exposure? Eq. (1) offers an explanation; while  
496 increased error sensitivity leads to faster initial learning upon re-exposure, if error sensitivity decays at  
497 the same rate during each exposure, error sensitivity will reach the same steady-state level irrespective  
498 of its initial magnitude.

499 Perhaps the most direct evidence for error sensitivity decay is the loss of savings after long  
500 periods of washout (Fig. 5C). That is, adaptation is faster with re-exposure to a perturbation (Fig. 5B),  
501 but not when perturbations are separated by long periods of washout<sup>32</sup>. Our model suggests that this  
502 dissolution of savings<sup>32,33</sup> is caused by gradual decay in error sensitivity over error-free periods. While  
503 not explored here, we speculate that decay in error sensitivity is more rapid after a movement, than  
504 with the passage of time alone. For example, with time alone memory decays, but the rate of re-  
505 learning remains elevated<sup>32,33,63</sup>, even after long breaks on the order of a day<sup>55,63</sup>.

506

507 *Alternate models*

508 Perturbation variance could also affect uncertainty of the learner. Over the past two decades, numerous  
509 studies<sup>28,58,67</sup> have used a Kalman filter<sup>68</sup> to study the relationship between uncertainty and learning  
510 rate. The Kalman filter describes the optimal way in which an observer should adjust their rate of  
511 learning in response to different sources of variability. This Bayesian framework has proved useful in  
512 understanding the slowing of adaptation in response to reductions in the reliability of sensory  
513 feedback<sup>69-71</sup>, speeding up of adaptation in response to uncertainty in the state of the individual or  
514 environment<sup>28,67,71</sup>, and even the optimal tuning of adaptation rates in individual subjects<sup>30</sup>.

515 Could this Bayesian framework also account for our results? The learning rate of a Kalman filter,  
516 and its steady-state properties depend on the ratio between two sources of variability: noise in the  
517 evolution of the generative process (e.g., perturbation) and the observation of trial-by-trial outcomes. If  
518 the brain were to interpret perturbation variability as an increase in observation noise, the Kalman  
519 framework would correctly predict that learning in the high-variance environment would proceed more  
520 slowly and saturate sooner than learning in the zero-variance environment. To fully capture our results,

521 the Kalman framework would also require the brain to increase its estimate of process variability over  
522 time, in order to achieve increases in error sensitivity (i.e., Kalman gain) over the course of adaptation  
523 both in the zero-variance and high-variance environments (Fig. 4I).

524 However, there is one feature of our data that the standard Kalman filter cannot explain:  
525 variation in error sensitivity across different error magnitudes (Fig. 4A). While in both the zero-variance  
526 and high-variance groups error sensitivity declined as a function of error size<sup>12,13,46,47</sup>, perturbation  
527 variance affected only the sensitivity to small errors, not large errors. Eq. (1) explained this pattern;  
528 differences in perturbation variability led to changes in the consistency of small errors, but not large  
529 errors. It is unclear how to account for this phenomenon using a Kalman filter whose error sensitivity  
530 (i.e., Kalman gain) is independent of both error size as well as error history.

531

### 532 *Neural basis of implicit error sensitivity*

533 Our finding that error consistency modulates the implicit component of adaptation raises important  
534 implications for the neural basis of error sensitivity. Implicit motor adaptation depends critically on the  
535 cerebellum<sup>72-76</sup>, where Purkinje cells learn to associate efference copies of motor commands with  
536 sensory consequences<sup>77</sup>. This learning is guided by sensory prediction errors, which are transmitted to  
537 the Purkinje cells via the inferior olive, resulting in complex spikes. Notably, plasticity in Purkinje cells  
538 exhibits both sensitivity to error, and forgetting. The response to error is determined by probability of  
539 complex spikes; in each Purkinje cell, the probability of complex spikes is greatest for a particular error  
540 vector<sup>77,78</sup>. Forgetting is present in the time-dependent retention of the plasticity caused by the complex  
541 spikes<sup>42,79</sup>, resulting in decay of plasticity with passage of time. Therefore, plasticity may saturate in the  
542 cerebellar cortex, limiting the total extent of adaptation.

543 Given these properties, how might perturbation variance alter the saturation of learning in the  
544 cerebellar cortex? One possibility is that the temporal consistency of complex spikes may alter the  
545 amount of plasticity experienced by each Purkinje cell. That is, when variance is low, errors of the same  
546 direction are likely to repeat, thus increasing the probability that the same population of Purkinje cells  
547 will experience multiple complex spikes in close temporal proximity. This theory makes the interesting  
548 prediction that the temporal proximity of complex spikes might modulate error sensitivity, thus altering  
549 the extent of adaptation. This idea remains to be tested.

550

551

## 552 **Methods**

553 Here we describe the experiments and corresponding analysis reported in the main text. These include  
554 Experiments 1-7, as well as data reproduced by other sources including Fernandes and colleagues<sup>19</sup>,  
555 Robinson and colleagues<sup>6</sup>, and Kojima and colleagues<sup>32</sup>, and Kim and colleagues<sup>13</sup>.

556

### 557 *Participants*

558 A total of 146 volunteers participated in our experiments. All experiments were approved by the  
559 Institutional Review Board at the Johns Hopkins School of Medicine.

560

### 561 *Apparatus*

562 In Experiments 1-7, participants held the handle of a planar robotic arm (Fig. 1A) and made reaching  
563 movements to different target locations in the horizontal plane. The forearm was obscured from view by  
564 an opaque screen. An overhead projector displayed a small white cursor (diameter = 3mm) on the  
565 screen that tracked the motion of the hand. Throughout testing we recorded the position of the handle  
566 at submillimeter precision with a differential encoder. Data were recorded at 200 Hz.

567

### 568 *Visuomotor rotation*

569 Experiments 1, 3, 4-7 followed a similar protocol. At the start of each trial, the participant brought their  
570 hand to a center starting position (circle with 1 cm diameter). After maintaining the hand within the  
571 start circle, a target circle (1 cm diameter) appeared in 1 of 4 positions (0°, 90°, 180°, and 270°) at a  
572 displacement of 8 cm from the starting circle. Participants then performed a “shooting” movement to  
573 move their hand briskly through the target. Each experiment consisted of epochs of 4 trials where each  
574 target was visited once in a pseudorandom order.

575 Participants were provided audiovisual feedback about their movement speed and accuracy. If a  
576 movement was too fast (duration < 75 ms) the target turned red. If a movement was too slow (duration  
577 > 325 ms) the target turned blue. If the movement was the correct speed, but the cursor missed the  
578 target, the target turned white. Successful movements (correct speed and placement) were rewarded  
579 with a point (total score displayed on-screen), an on-screen animation, and also a pleasing tone (1000  
580 Hz). If the movement was unsuccessful, no point was awarded and a negative tone was played (200 Hz).  
581 Participants were instructed to obtain as many points as possible throughout the experimental session.

582 Once the hand reached the target, visual feedback of the cursor was removed, and a yellow  
583 marker was frozen on-screen to provide static feedback of the final hand position. At this point,  
584 participants were instructed to move their hand back to the starting position. The cursor continued to  
585 be hidden until the hand was moved within 2 cm of the starting circle. In most experiments, participants  
586 actively moved their hand back to the start position. However, in Experiments 3, 6, and 7 the robot  
587 assisted the subject if their hand had not returned to the start position after 1 second.

588 Movements were performed in one of three conditions: null trials, rotation trials, and no  
589 feedback trials. On null trials, veridical feedback of hand position was provided. On rotation trials, once  
590 the target appeared on screen, the on-screen cursor was rotated relative to the start position (Fig. 1A).  
591 Some rotation experiment terminated with a period of no feedback trials. On these trials, the subject  
592 cursor was hidden during the entire trial. No feedback was given regarding movement endpoint,  
593 accuracy, or timing.

594 As a measure of adaptation, we analyzed the reach angle on each trial. The reach angle was  
595 measured as the angle between the line segment connecting the start and target positions, and the line  
596 segment connecting the start and final hand position (defined as the point where the hand exceeded  
597 95% of the target displacement). For analysis of reaching errors, we computed the same quantity, but  
598 for the final cursor position rather than the final hand position.

599

#### 600 *Force field adaptation*

601 In Experiment 2, participants were perturbed by a velocity-dependent force field (Fig. 1A), as opposed to  
602 a visuomotor rotation. At trial onset, a circular target (diameter= 1 cm) appeared in the workspace,  
603 coincident with a tone that cued subject movement. Participants then reached from the starting  
604 position to the target. The trial ended when the hand stopped within the target location. After stopping  
605 the hand within the target, feedback about movement duration was provided. If the preceding reach  
606 was too slow, the target turned blue and a low tone was played. If the reach was too fast, the target  
607 turned red and a low tone was played. If the reach fell within the desired movement interval (450-550  
608 ms), the subject was rewarded with a point to their total score, an animation, and a pleasing tone (1000  
609 Hz). Participants were instructed to obtain as many points as possible. After completing each outward  
610 reaching movement, participants were instructed to then bring their hand back to the starting position.  
611 This return movement was not rewarded and was always guided by a “channel” (see below).

612 As in the rotation experiments, the target appeared in 1 of 4 positions (0°, 90°, 180°, and 270°)  
613 at a displacement of 10 cm from the starting circle. Each experiment consisted of epochs of 4 trials  
614 where each target was visited once in a pseudorandom order. The experiment began with a set of null  
615 field trials (no perturbations from the robot). After this period, participants were exposed to a force  
616 field. The force field was a velocity-dependent curl field (Fig. 1A) in which the robot generated forces  
617 proportional and perpendicular to the velocity of the hand according to:

$$618 \begin{bmatrix} f_x \\ f_y \end{bmatrix} = b \begin{bmatrix} 0 & -1 \\ 1 & 0 \end{bmatrix} \begin{bmatrix} v_x \\ v_y \end{bmatrix} \quad (2)$$

619 where  $v_x$  and  $v_y$  represent the x and y velocity of the hand,  $f_x$  and  $f_y$  represent the x and y force  
620 generated by the robot on the handle, and  $b$  represents the magnitude (and orientation) of the force  
621 field.

622 Subject reaching forces were measured on designated “channel” trials<sup>36</sup> where the motion of  
623 the handle was restricted to a linear path connecting the start and target locations (Fig. 1A). To restrict  
624 hand motion to the straight-line channel trajectory, the robot applied perpendicular stiff spring-like  
625 forces with damping (stiffness = 6000 N/m, viscosity = 250 N-s/m). Reaching forces were measured on  
626 every 5<sup>th</sup> epoch of movements with a cycle of 4 channel trials (one per target). In addition, the  
627 experiment terminated with a block of channel trials retention of the adapted state over trials.

628 Offline we isolated the perpendicular forces produced against the channel wall. We subtracted  
629 off the average force produced on channel trials during the baseline period. To measure adaptation, we  
630 calculated an adaptation index. The adaptation index represents the scaling factor relating the force  
631 produced on a given trial and the ideal force the subject would produce if they were fully adapted to the  
632 perturbation<sup>27</sup>. To calculate this scaling factor, we linearly regressed the ideal force timecourse (product  
633 of velocity and perturbation magnitude) onto the actual force timecourse.



634 In addition to analyzing the forces produced on channel trials, we also analyzed the trajectory of  
635 the hand on perturbation trials. From each trajectory we isolated a signed movement error, which we  
636 used to calculate the probability that an error switched sign from one trial to the next (Fig. 4C, Exp. 2).  
637 To calculate the movement error, we isolated the portion of each reaching movement between 20% and  
638 90% of target displacement. Within this region we detected the maximum absolute error and treated  
639 this as the error magnitude. We signed this error according to whether the hand was to the left or right  
640 (or top or bottom) of the line connecting the start position and target position. To prevent minor  
641 overcompensations from being treated as movement errors, deviations that fell within 3 mm of the line  
642 connecting the start and target locations were not treated as errors. Using smaller thresholds of 1 or 2  
643 mm did not qualitatively affect our results.

644

#### 645 *Statistics*

646 Statistical tests such as repeated measures ANOVA, two-way ANOVA, and mixed-ANOVA were carried  
647 out in IBM SPSS 25. In all cases we report the p-value, F-value, and  $\eta_p^2$  for each test. For post-hoc testing  
648 we employed t-tests with Bonferroni corrections. For these tests, we report the p-value and Cohen's d  
649 as a measure of effect size. Our mixed-ANOVA contained a between-subjects factor and a within-  
650 subjects repeated measure. For the within-subjects repeated measure, data are binned within small  
651 windows defined by differences in error size. In the event that a participant is missing data within a bin  
652 (data are missing in approximately 13.2% of all bins), we replaced the missing data point with the mean  
653 of the appropriate distribution.

654

#### 655 *Experiment 1*

656 We tested how variance in the perturbation affected the total extent of visuomotor adaptation. The  
657 experiment started with 10 epochs (40 trials) of no perturbation. After this a perturbation period began  
658 that consisted of 60 rotation epochs (240 trials total). At the end of the perturbation period, retention of  
659 the visuomotor memory was tested in a series of 15 epochs (60 trials) of no feedback. To test the effect  
660 of perturbation variance on behavior, participants were divided into 1 of 2 groups. In the zero-variance  
661 group, participants (n=19) were exposed to a constant visuomotor rotation of 30°. In the high-variance  
662 group, participants (n=14) were exposed to a visuomotor rotation that changed on each trial. The  
663 rotation was sampled from a normal distribution with a mean of 30° and a standard deviation of 12°.

664

#### 665 *Experiment 2*

666 We found that perturbation variance reduced the total amount of adaptation in Experiment 1. To test if  
667 this impairment was a general property of sensorimotor adaptation, we tested another group of  
668 subjects with a force field. The experiment started with 10 epochs (40 trials) of no perturbation (2 of  
669 these epochs were channel trials). After this a perturbation period began that consisted of 75 epochs  
670 (300 trials, 20% were channel trials) of force field perturbations. At the end of the perturbation period,  
671 retention of the adapted state was tested in a series of 10 epochs (40 trials) of channel trial movements.  
672 To test the effect of perturbation variance on behavior, participants were divided into 1 of 2 groups. In  
673 the zero-variance group, participants (n=12) were exposed to a constant force field magnitude of 14 N-  
674 s/m. In the high-variance group, participants (n=13) were exposed to a force field magnitude that

675 changed on each trial. The force field magnitude was sampled from a normal distribution with a mean of  
676 14 N-s/m and a standard deviation of 6 N-s/m.

677

### 678 *Experiment 3*

679 Inspection of the learning curves in Experiment 1 indicated that performance may not have completely  
680 saturated by the end of the perturbation period. Therefore, we repeated Experiment 1, but this time  
681 more than doubled the number of perturbation trials. The experiment started with 5 epochs (20 trials)  
682 of no perturbation. The following perturbation period consisted of 160 rotation epochs (640 trials). As in  
683 Experiment 1, participants were divided into a zero-variance group (n=10) and a high-variance group  
684 (n=10). Perturbation statistics remained identical to Experiment 1.

685

### 686 *Experiment 4*

687 To determine if perturbation variance causally altered the total extent of adaptation, we designed a  
688 control experiment. In this experiment, participants started with a visuomotor rotation in the zero-  
689 variance condition, and then were exposed to the high-variance condition midway through the  
690 experiment. If variance causally determined the total amount of learning, we expected that asymptotic  
691 performance would decrease after the addition of variability to the perturbation. Participants (n=14)  
692 began the experiment with 5 epochs (20 trials) of null trials. After this, the zero-variance period started.  
693 Participants were exposed to either a CW or CCW visuomotor rotation of 30° for a total of 80 epochs  
694 (320 trials). At the end of this period, participants switched to a high-variance condition where the  
695 rotation was sampled on each trial from a normal distribution with a mean of 30° and a standard  
696 deviation of 12°. This period lasted for an additional 80 epochs (320 trials). Finally, the experiment  
697 concluded with 15 epochs (60 trials) of no feedback trials.

698

### 699 *Experiment 5*

700 In Experiment 5, we suppressed implicit adaptation for the duration of the experiment, and measured  
701 the marginal effect of perturbation variability on the isolated explicit adaptation. To reduce implicit  
702 learning and isolate explicit strategy, we used experimental conditions that are well established to  
703 inhibit implicit learning. We removed all visual feedback of the cursor during the reach. Instead, only the  
704 terminal endpoint of the cursor was displayed, with a long delay of 1055 ms. In other words, visual  
705 feedback of the reach endpoint was shown approximately 1 second after the reach had ended. Delaying  
706 visual feedback has been shown to inhibit implicit recalibration of reach angle<sup>25,26,39,40</sup>. Apart from this  
707 change in feedback, all other details of the task were identical to Experiment 1.

708

### 709 *Experiment 6*

710 In Experiment 6, we suppressed explicit adaptation for the duration of the experiment, and measured  
711 the marginal effect of perturbation variability on the isolated implicit adaptation. To isolate implicit  
712 adaptation, we limited the time participants had to prepare their movements. Limiting reaction time is  
713 known to suppress explicit strategy<sup>22-24</sup>. To limit reaction time, we instructed participants to begin their  
714 reaching movement as soon as possible, once the target was revealed. To enforce this, we limited the  
715 amount of time available for the participants to start their movement after the target location was  
716 shown. This upper bound on reaction time was set to either 225, 235, or 245 ms (taking into account

717 screen delay). If the reaction time of the participant exceeded the desired upper bound, the participant  
718 was punished with a screen timeout after providing feedback of the movement endpoint. In addition, a  
719 low unpleasant tone (200 Hz) was played, and a message was provided on screen that read “React  
720 faster”. As in Experiment 1, participants were divided into a zero-variance perturbation group (n=13)  
721 and a high-variance group (n=12). All other details were identical to Experiment 1.

722

### 723 *Experiment 7*

724 Sensorimotor adaptation is supported by both explicit strategy and implicit learning<sup>10</sup>. In Experiments 5  
725 and 6, we isolated these systems so that each one alone adapted to the perturbation. In Experiment 7,  
726 we tested each simultaneously. The trial structure was equivalent to Experiment 1. Participants were  
727 placed into a zero-variance perturbation group (n=9; mean rotation of 30°, std. dev. of 0°) or a high-  
728 variance perturbation group (n=9; mean rotation of 30°, std. dev. of 12°). Participants performed 10  
729 epochs of baseline no rotation trials, followed by 60 epochs (240 trials) of rotation trials.

730 After the last rotation epoch, the experiment was stopped briefly and the participants were  
731 provided with verbal instructions designed to isolate each participant’s implicit recalibration of reach  
732 angle<sup>12,13,80</sup>. Participants were told that for the next few trials there will be no cursor on the screen and  
733 no perturbation to the cursor position. Additionally, they were instructed to forget about the cursor,  
734 think only about their hand, and try to move their physical hand straight through the center of the  
735 target. After participants indicated that they understood the instructions, they performed one reaching  
736 movement to each of the 4 targets in a pseudorandom order without any visual feedback. The mean  
737 reach angle across the targets served as our measure of their final implicit reach angle (Fig. 2G, implicit,  
738 instruct). In addition, we subtracted this implicit reach angle from the mean reach angle measured over  
739 the last 10 epochs of the perturbation (prior to the verbal instruction) to estimate their explicit reach  
740 angle at the end of adaptation (Fig. 2G, explicit, instruct).

741 After this implicit probe period, we performed an additional test to directly assay each subject’s  
742 explicit re-aiming strategy. Each of the 4 targets was shown an additional time, with a ring of small white  
743 landmarks placed at an equal radial distance around the screen<sup>9</sup>. A total of 108 landmarks was used to  
744 uniformly cover the circle. Each landmark was labeled with a unique alphanumeric string. Participants  
745 were asked to report the nearest landmark that they were aiming towards at the end of the experiment  
746 in order to move the cursor through the target when the rotation was on. The mean angle reported  
747 across all 4 targets was calculated to provide an additional assay of explicit adaptation (Fig. 2G, explicit,  
748 clock). Explicit re-aiming is prone to erroneous selections where the participant mentally rotates the  
749 cursor in the wrong direction<sup>23</sup> (errors of same magnitude, opposite sign). Therefore, for measurements  
750 where the participant reported an explicit angle in the opposite direction, we used its absolute value  
751 when calculating their explicit recalibration. Note that only 8 of the 9 participants in the high-variance  
752 group reported their aiming angles using this probe.

753

### 754 *State-space model of learning*

755 After the experience of a movement error, humans and other animals change their behavior on future  
756 trials. In the absence of error, adapted behavior decays over time. Here we used a state-space model<sup>81</sup>  
757 to capture this process of error-based learning. Here, the internal state of an individual  $x$ , changes from  
758 trials  $n$  to  $n+1$  due to learning and forgetting.

759 
$$x^{(n+1)} = ax^{(n)} + b^{(n)}e^{(n)} + \varepsilon_x^{(n)} \quad (3)$$

760 Forgetting is controlled by the retention factor  $a$ . The rate of learning is controlled by the error  
761 sensitivity  $b$ . Error sensitivity was modulated over time according to Eq. (1) in the main text. Learning  
762 and forgetting are stochastic processes affected by internal state noise  $\varepsilon_x$ : a normal random variable  
763 with zero-mean and standard deviation of  $\sigma_x$ .

764 While we cannot directly measure the internal state of an individual, we can measure their  
765 movements. The internal state  $x$  leads to a movement  $y$  according to:

766 
$$y^{(n)} = x^{(n)} + \varepsilon_y^{(n)} \quad (4)$$

767 The desired movement is affected by execution noise, represented by  $\varepsilon_y$ : a normal random variable  
768 with zero-mean and standard deviation of  $\sigma_y$ . To complete the state-space model described by Eqs. 3  
769 and 4, we must operationalize the value of an error,  $e$ . In sensorimotor adaptation, movement errors  
770 are determined both by motor output of the participant ( $y$ ) and the size of the external perturbation ( $r$ ):

771 
$$e^{(n)} = r^{(n)} - y^{(n)} \quad (5)$$

772 We used Eqs. (1,3-5) to produce motor output in Fig. 4. More details about the modulation of error  
773 sensitivity are provided below. In addition, we used Eqs. (3-5) with fixed error sensitivity to simulate the  
774 learning traces in Figs. 3A-C.

775

#### 776 *Asymptotic properties of learning*

777 State-space models of learning predict that performance saturates after prolonged exposure. This  
778 saturation is caused by a steady state condition where the amount of learning from error is exactly  
779 counterbalanced by the amount of forgetting (Fig. 3A). The steady state can be derived from Eqs. (3)-(5):

780 
$$y_{ss} = \frac{b\bar{r}}{1-a+b} \quad (6)$$

781 The formula for steady-state adaptation ( $y_{ss}$ ) shows that one's learning extent depends on 3 factors: (1)  
782 error sensitivity  $b$ , (2) retention factor  $a$ , and (3) the mean of the perturbation  $\bar{r}$ . If there is no  
783 forgetting ( $a = 1$ ), an individual will adapt completely to the mean of the perturbation. However, if  
784 retention is incomplete ( $a < 1$ ), the steady state behavior ( $y_{ss}$ ) will always fall short of the mean of the  
785 perturbation, resulting in residual errors.

786 Eq. (6) is important for three reasons. (1) It demonstrates why the total extent of learning varies  
787 with a change in forgetting rate (Fig. 3B). (2) It demonstrates why the total extent of learning varies with  
788 a change in error sensitivity (Fig. 3C). (3) It demonstrates that the total amount of learning does not  
789 directly depend on variability in the perturbation, only the mean of the perturbation.

790

#### 791 *Calculation of the retention factor*

792 To determine if differences in learning extent were caused by a change in the rate of forgetting, we  
793 estimated the retention factor ( $a$ ) of each participant. To do this, we quantified how behavior decayed  
794 during the error-free periods that terminated Experiments 1, 2, 4, and 6. During the error-free periods,  
795 trial errors were either hidden (no feedback condition in visuomotor rotation experiments) or fixed to  
796 zero (channel trials in the force field adaptation experiment). In the absence of error ( $e=0$ ), our state-  
797 space model simplifies to exponential decay (omitting noise terms):

798 
$$y^{(n)} = a^{n-m} y^{(m)} \quad (7)$$

799 Eq. (7) relates motor output ( $y$ ) on trial  $n$  of the error-free period to the initial motor behavior measured  
800 at the end of the adaptation period,  $y^{(m)}$ . The term  $n - m$  represents the number of trials that elapsed  
801 from the start of the error-free period until the current trial  $n$ .

802 For visuomotor rotation experiments, we estimated the retention factor separately for each  
803 target by fitting Eq. (7) to subject behavior in the least-squares sense. We report the mean retention  
804 factor in Fig. 3F. For force field adaptation, we estimated a single retention factor, by first averaging the  
805 adaptation index across the 4 targets in each epoch, and then fitting Eq. (7) to the epoch-by-epoch  
806 behavior in the least-squares sense. In Fig. 3F, we converted this epoch-based retention factor to a trial-  
807 based retention factor by raising the epoch-based retention factor to the power of 1/4 (an epoch of 4  
808 trials has 4 trial-by-trial decay events).

809

### 810 *Calculation of error sensitivity*

811 Using Eq. (7), we found that changes in learning saturation were not caused by modulation of forgetting  
812 rates. Next, we determined how variability impacted error sensitivity ( $b$ ), using its empirical definition:

$$813 \quad b^{(n_1)} = \frac{y^{(n_2)} - a^{n_2 - n_1} y^{(n_1)}}{e^{(n_1)}} \quad (8)$$

814 Eq. (8) determines the sensitivity to an error experienced on trial  $n_1$  when the participant visited a  
815 particular target T. This error sensitivity is equal to the change in behavior between two consecutive  
816 visits to target T, on trials  $n_1$  and  $n_2$  (i.e., there are no intervening trials where target T was visited)  
817 divided by the error that had been experienced on trial  $n_1$ . In the numerator, we account for decay in  
818 the behavior by multiplying the behavior on trial  $n_1$  by a decay factor that accounted for the number of  
819 intervening trials between trials  $n_1$  and  $n_2$ . For each target, we used the specific retention factor  
820 estimated for that target with Eq. (7).

821 We used Eq. (8) to calculate error sensitivity for all of our visuomotor rotation experiments.  
822 When reporting error sensitivity, we averaged across the four targets (Figs. 3G, 4A, 4I, 4J). In some cases  
823 (Fig. 3G) we collapsed trial-by-trial measurements of error sensitivity across all trials and all errors. In  
824 other cases, we calculated the change in error sensitivity over different periods of training. For Fig. 4J,  
825 we measured the change in sensitivity from the beginning (epochs 1-10) to the end (epochs 49-59) of  
826 the perturbation block in Exp. 6 (implicit only). To remove outliers, we identified error sensitivity  
827 estimates that deviated from the population median by over 3 median absolute deviations. We did this  
828 within windows of 10 epochs. This procedure was also used to compute the timecourse in Fig. 4I.

829 In Fig. 4A, we calculated error sensitivity for errors of different sizes combining together data  
830 from Exps. 1, 4, and 6. We divided up the error space into bins of small errors (5-14°), medium errors  
831 (14-22°), and large errors (22-30°). To prevent noisy estimates of error sensitivity from populating each  
832 bin, we added a subject to a bin contingent on them at least having 12 trials (5% of the total number of  
833 adaptation trials) for which an error was experienced in the corresponding range). We did not consider  
834 errors smaller than 5° because the empirical estimator in Eq. (8) becomes unstable for small error sizes.

835 For force field adaptation, we could not empirically estimate error sensitivity, as this approach  
836 requires the measurement of forces directly before and after the experience of an error. However, in  
837 reality, forces are measured only on infrequent channel trials, making such an empirical calculation  
838 impossible. For this reason, we used a model-based approach to measure error sensitivity (Fig. 3G, Exp.

839 2). We fit our state-space model Eqs. (3-5) to single subject data in the least-squares sense, over the last  
840 5 channel trial epochs of the adaptation period. To do this, we needed to describe four states of learning  
841 (one for each target). We describe multitarget state-space models in more detail in an earlier work<sup>81</sup>. As  
842 a brief summary, we modeled our multitarget experiment by applying Eqs. (3-5) separately for each  
843 target. On any given trial, the state corresponding to the relevant target learned from the error on that  
844 trial. The other three states exhibited only decay on that trial. We described the perturbation  $r$  in terms  
845 of the force field magnitude on that trial (14 N-s/m was considered a perturbation of unit 1 in the  
846 model). Using this framework, we found the error sensitivity that minimized the squared difference  
847 between our model simulation and participant behavior.

848

#### 849 *Decaying memory of errors model*

850 To account for the relationship between error sensitivity and error consistency (Fig. 4A) we adapted the  
851 memory of errors model proposed by Herzfeld and colleagues<sup>31</sup>. This model uses a simple normative  
852 framework. When the errors on trial  $n$  and trial  $n+1$  have the same sign (a consistent error), this signals  
853 that the brain under-corrected for the first error (Fig. 4B, left). Therefore, the brain should increase its  
854 sensitivity to the initial error. On the other hand, when the errors on trials  $n$  and  $n+1$  have opposite signs  
855 (an inconsistent error), this signals that the brain over-corrected for the first error (Fig. 4B, right).  
856 Therefore, the brain should decrease its sensitivity to the initial error. These rules are encapsulated by  
857 the right-most term of Eq. (1).

858 The right-most term in Eq. (1) alone accounts for a rich set of behavioral phenomena including  
859 savings and meta-learning<sup>31</sup>. However, its ability to describe saturation of learning is limited by its lack of  
860 decay. Without trial-based decay in error sensitivity, common experimental conditions prevent the  
861 model from reaching a saturation point. For this reason, our adapted memory of errors model (Eq. (1))  
862 includes a term for learning, controlled by the parameter  $\beta$ , and a term for decay, controlled by the  
863 parameter  $\alpha$ .

864 The combination of  $\alpha$ ,  $\beta$ , and trial-to-trial error consistency determine how error sensitivity  
865 changes over time. Critically, error sensitivity changes locally, that is, only errors near that experienced  
866 on trial  $n$  will experience an upregulation or downregulation in sensitivity. To enforce this, the  $\mathbf{c}$  vector in  
867 Eq. (1) has all but one entry equal to zero. The vector contains a single value of one, at the index  
868 corresponding to an error window containing the error experienced on trial  $n$ . For our model predictions  
869 in Fig. 4, we spaced non-overlapping error windows between errors of  $-100^\circ$  and  $100^\circ$ , each with a width  
870 of  $5^\circ$ . The term  $\Delta\mathbf{b}$  is a vector whose elements represents the change in error sensitivity within each  $5^\circ$   
871 bin. On any given trial, the error sensitivity of the learner was obtained through:

$$872 \quad \mathbf{b}^{(n)} = \mathbf{b}_0 + \mathbf{c}^T(\mathbf{e}^{(n)})\Delta\mathbf{b}^{(n)} \quad (9)$$

873 Here  $\mathbf{b}_0$  represents the baseline error sensitivity of the system. Altogether, Eqs. (2-5) describe our state-  
874 space model whose error sensitivity is updated trial-by-trial according to Eqs. (1) and (9).

875 In Fig. 4, we fit our decaying memory of errors model to the implicit-only behavior measured  
876 under reaction time restrictions in Experiment 6. We fit the two free parameters,  $\alpha$  and  $\beta$ , to the mean  
877 reach angles in the least-squares sense. Both the zero-variance and the high-variance groups were fit at  
878 the same time with the same parameter set. For the fitting process, we fixed all other model parameters  
879 to empirical measurements. For the initial error sensitivity  $\mathbf{b}_0$ , we used the median initial error sensitivity

880 (0.037) measured across the zero-variance and high-variance groups in Experiment 6. For the retention  
881 factor, we again combined both groups, converted trial-based retention factors to epoch-based  
882 retention factors, averaged the retention factor across all 4 targets, removed any retention factors  
883 greater than one, and then calculated the midpoint of the resulting distribution. This yielded an epoch-  
884 by-epoch retention factor of 0.9134.

885 To identify the optimal values of  $\alpha$  and  $\beta$ , we used the following grid-search procedure across all  
886 pairwise combinations of  $\alpha$  (300 values spaced evenly between 0.95 and 0.995) and  $\beta$  (300 values  
887 spaced evenly between 0.01 and 0.1). For any given pair of  $\alpha$  and  $\beta$ , we used Eq. (1) to predict changes  
888 in error sensitivity within each  $5^\circ$  bin. We did this for the exact error sequence measured in each  
889 individual participant. That is, for each participant, we used their error sequence,  $\alpha$ , and  $\beta$  to predict  
890 how error sensitivity should vary as function of trial and error size. This process yielded a separate error  
891 sensitivity for each error size. These multiple timeseries were collapsed into one, by selecting the error  
892 sensitivity corresponding to the error experienced on the appropriate trial. For example, if on trial  $m$  the  
893 participant experienced an error in bin  $b$ , the collapsed timecourse used the predicted error sensitivity  
894 in bin  $b$  on trial  $m$ . We did this for all 4 targets separately, and then averaged the predicted timecourses  
895 across the targets. Finally, we then averaged across participants. In this way, we used the actual error  
896 consistency in each participant along with Eq. (1) to predict error sensitivity as a function of trial. The  
897 noisy traces in Fig. 4F show the mean predicted error sensitivity for the optimal parameter set.

898 Next, we used this mean predicted error sensitivity to simulate the state-space model specified  
899 by Eqs. (3-5). In other words, we simulated Eqs. (3-5) varying error sensitivity from one trial to the next  
900 according to the predicted trace obtained from Eq. (1). Note that this process would tend to yield a  
901 noisy adaptation profile, as the underlying estimates of error sensitivity were noisy (see noisy traces in  
902 Fig. 4F). Therefore, we used a smoothed version of these estimates for our simulation. These smoothed  
903 estimates are depicted by the blue lines in Fig. 4F. To produce these smoothed traces, we used a  
904 piecewise fit to the data. We divided the error sensitivity trace into two parts (for the zero-variance  
905 perturbation, these parts were divided on epoch 20; for the high-variance perturbation, these parts  
906 were divided on epoch 7). For the first part, we fit an exponential function that minimized the squared  
907 error between the empirical fit and measured error sensitivity. This fit was constrained to begin at  $b_0$ ,  
908 and terminate continuously with the smoothed fit to the second part of the data. For the second part of  
909 the data we fit a cubic smoothing spline using the *csaps* function in MATLAB R2019a with a roughness  
910 measure of 0.0003.

911 Altogether, for any set of  $\alpha$  and  $\beta$ , this yielded a mean predicted behavior. We identified the  $\alpha$   
912 and  $\beta$  that minimized the squared error between the model predictions and the measured behavior  
913 across the zero-variance and high-variance groups. This yielded  $\alpha = 0.9568$  and  $\beta = 0.0558$ . Using these  
914 parameters, we not only simulated the expected error sensitivity timecourse in Fig. 4F, but also the  
915 corresponding learning curve in Fig. 4G (model). In Fig. 4J we report the change in error sensitivity  
916 predicted across the zero-variance and high-variance group. For this, we calculated the change in  
917 predicted implicit error sensitivity from the first 10 epochs to the last 10 epochs in Fig. 4F.

918

919 *Fernandes and colleagues (2012)*

920 In Fig. 1B, we reference earlier work from a study by Fernandes and colleagues<sup>19</sup>. Briefly, participants  
921 ( $n=16$ ) made a center-out reaching movement to a target. After the reach ended, participants were

922 shown the final location of the right index finger. Participants performed three experimental blocks.  
923 Each block had the same general structure. At the start of the block, participants made 40 reaching  
924 movements to 8 different targets (5 for each target) with continuous visual feedback of the cursor. Next,  
925 participants made an additional 80 reaching movements to 8 different targets (10 for each target) using  
926 only endpoint feedback of the cursor position. After this baseline period, a single target position was  
927 selected, and 240 reaching movements were performed under the influence of a visuomotor rotation.  
928 The visuomotor rotation was sampled on each trial from a normal distribution with a mean of 30° and a  
929 standard deviation of either 0°, 4°, or 12°. The block ended in a set of 160 generalization trials that are  
930 not relevant to the current study. The experiment had a within-subject design. Each participant was  
931 exposed to all three perturbation variances, but in a random order. The orientation of the rotation (CW  
932 or CCW) was randomly chosen on each block. In addition, the target selected during the adaptation  
933 period was randomly chosen from 1 of the 4 diagonal targets on each block.

934

#### 935 *Kim and colleagues (2018)*

936 We compared the implicit learning measured under reaction time restrictions in Experiment 6, to the  
937 implicit learning measured under the constant error-clamp conditions reported by Kim and colleagues<sup>13</sup>.  
938 Specifically, we calculated the standard deviation of the terminal amount of implicit learning reported  
939 under both conditions. For Kim and colleagues, we visually inspected Fig. 2b of the corresponding  
940 manuscript in Adobe Illustrator to obtain the asymptotic implicit hand angle for the 1.75° clamp group,  
941 the 3.5° clamp group, and the 15° clamp group. We collapsed participants across groups and then  
942 calculated the standard deviation of the resulting distribution. For our data, we considered the zero-  
943 variance group in Experiment 6. We calculated the mean reaching angle on the last 2 cycles of the  
944 rotation period. We used 2 cycles as this would equal 8 total trials, which matches the number of trials  
945 included in the constant error-clamp measure. We then calculated the standard deviation of terminal  
946 implicit angles across all participants. For our data, the standard deviation was 3.17°. For Kim and  
947 colleagues<sup>13</sup> the standard deviation was 9.59°, representing an increase of approximately 300% over our  
948 measure of implicit learning.

949

#### 950 *Robinson and colleagues (2003)*

951 Robinson and colleagues<sup>6</sup> adapted monkeys to a saccadic perturbation, where the error on every trial  
952 was fixed to -1° independent of the monkey's motor output (Fig. 5A). Critically, despite the fact that  
953 error never decreased, learning still reached a saturation point. To reach this steady-state, sensitivity to  
954 error must also reach an asymptotic limit. How does the memory of errors account for this limit?

955 Here we fit two variants of the memory of errors model to these constant error-clamp data,  
956 shown in the middle inset of Fig. 5B. One of these models assumed that error sensitivity did not decay  
957 from one trial to the next ( $\alpha=1$ ). The other model allowed error sensitivity to decay ( $\alpha<1$ ). To fit these  
958 models to the measured data, we extracted behavior from the original manuscript using the GRABIT  
959 routine in MATLAB R2018a. For our simulations, we set the initial error sensitivity to 0.005 and used a  
960 retention factor of 0.98. We divided up the error sensitivity bins in Eq. (1) into 100 windows spaced  
961 evenly between errors of -6 and 6°. Also, we simulated deterministic behavior by setting  $\sigma_x$  from Eq. (3)  
962 and  $\sigma_y$  from Eq. (4) both equal to 0°.



963 To fit the decaying model and decay-free model to the behavior, we used *fmincon* in MATLAB  
964 R2018a to identify the parameter set that minimized the sum of squared error between the model  
965 predictions and measured behavior. We predicted behavior using the state-space model specified by  
966 Eqs. (3-5) with an error sensitivity that varied according to Eq. (1). To account for the initial bias in  
967 saccade gain, we subtracted off a gain of 0.133 from the behavior predicted by our state-space model.  
968 For each model, we performed 100 iterations of *fmincon* each time varying the parameter set used to  
969 seed the algorithm. For the decay-free model ( $\alpha=1$ ), the optimal value of  $\beta$  was  $8.163 \times 10^{-5}$ . For the  
970 decaying model, the optimal parameter set was  $\alpha=0.9883$  and  $\beta=0.0006$ . The behavior predicted by  
971 each model is shown in the middle inset of Fig. 5. The corresponding error sensitivity is shown at the  
972 bottom of Fig. 5.

973

974 *Kojima and colleagues (2004)*

975 Kojima and colleagues<sup>32</sup> exposed monkeys to a  $3.5^\circ$  visual perturbation, then a  $-3.5^\circ$  perturbation,  
976 followed by re-exposure to the original  $3.5^\circ$  perturbation (Fig. 5B, no zero-error period). This paradigm  
977 elicited savings, a faster rate of re-learning that is linked to increases in error sensitivity<sup>29,31,48,49</sup> (Fig. 5B,  
978 compare initial rates of learning denoted by the linear regression lines in the middle inset). However,  
979 when a long period of no perturbation trials was inserted after washout (Fig. 5C, zero-error period), no  
980 savings was observed (Fig. 5C, compare initial rates of learning denoted by the linear regression lines).  
981 These data provide clear evidence that error sensitivity decays over long time scales. How do the decay  
982 ( $\alpha < 1$ ) and decay-free ( $\alpha = 1$ ) variants of the memory of errors model account for the dissolution of  
983 savings with extended washout?

984 Data from their original manuscript is reproduced in Figs. 5B-D. Here we contrast the predictions  
985 of the decay-free and decaying model. We simulated these models in the short washout paradigm in Fig.  
986 5B. For the short washout paradigm, we simulated 750 trials of a  $3.5^\circ$  gain-up perturbation, followed by  
987 417 trials of a  $-3.5^\circ$  gain-down perturbation, followed by 750 trials of the  $3.5^\circ$  gain-up perturbation. We  
988 chose 417 trials for the gain down perturbation because at this trial behavior reached baseline saccade  
989 amplitude. For the long washout paradigm in Fig. 5C, we simulated the same schedule, only adding 780  
990 trials of zero perturbation trials prior to re-exposure to the  $3.5^\circ$  perturbation. We chose 780 trials to  
991 match the paradigm reported by Kojima and colleagues<sup>32</sup>.

992 To simulate each model, we used a retention factor of 1, an initial error sensitivity of  $8.6 \times 10^{-4}$ ,  
993 and 30 error sensitivity bins (Eq. (1)) spaced evenly between errors of  $-6^\circ$  and  $6^\circ$ . For both the decay and  
994 decay-free models, we used  $\beta = 1.25 \times 10^{-5}$ . We selected these parameters so that the model predictions  
995 matched the early learning rates reported in the original manuscript. That is, the slope over the first 150  
996 trials of the first and second exposures to the gain-up perturbation was equal to  $4 \times 10^{-4}$  and  $6.9 \times 10^{-4}$   
997  $^\circ/\text{trial}$ , respectively. For the no-decay model,  $\alpha$  was set to 1 for the entirety of the simulation. For  
998 simplicity of comparison, we matched the behavior of the decaying model to the decay-free by starting  
999 with these same parameters. However, during the zero-error period, we set the  $\alpha$  parameter to 0.989  
1000 for the decaying model. This value was selected from our main result in Fig. 4 (here the epoch-by-epoch  
1001 decay parameter was equal to 0.9568, and so we raised it to the 0.25 power to obtain a trial-by-trial  
1002 decay parameter). Finally, we simulated stochastic output of the decay and no-decay models, setting  $\sigma_x$   
1003 from Eq. (3) equal to  $0^\circ$ , and  $\sigma_y$  from Eq. (4) equal to  $0.2^\circ$ .

1004           The behaviors predicted by the decay and no-decay models are shown in Figs. 5B and 5C, at  
1005 bottom. These curves represent the mean behavior predicted across 100,000 simulations of the state-  
1006 space model. We quantified savings similar to the original manuscript by Kojima and colleagues<sup>32</sup>, using  
1007 linear regression. Here, we linearly regressed the simulated behavior onto the trial counts over the  
1008 periods designated by “i”, “ii”, and “iii” in Figs. 5B and C. These periods represent the first 150 trials of  
1009 the perturbation. Then we calculated the percent change in rate from “i” to “ii” (for the short washout  
1010 experiment) and “i” to “iii” for the long washout experiment (Fig. 5D). We compared these predicted  
1011 values for the decaying model and decay-free model, to the empirical measurements reported in the  
1012 original manuscript (these values are shown next to the regression lines in Figs. 5B and 5C, and are  
1013 represented by the black bars in Fig. 5D).

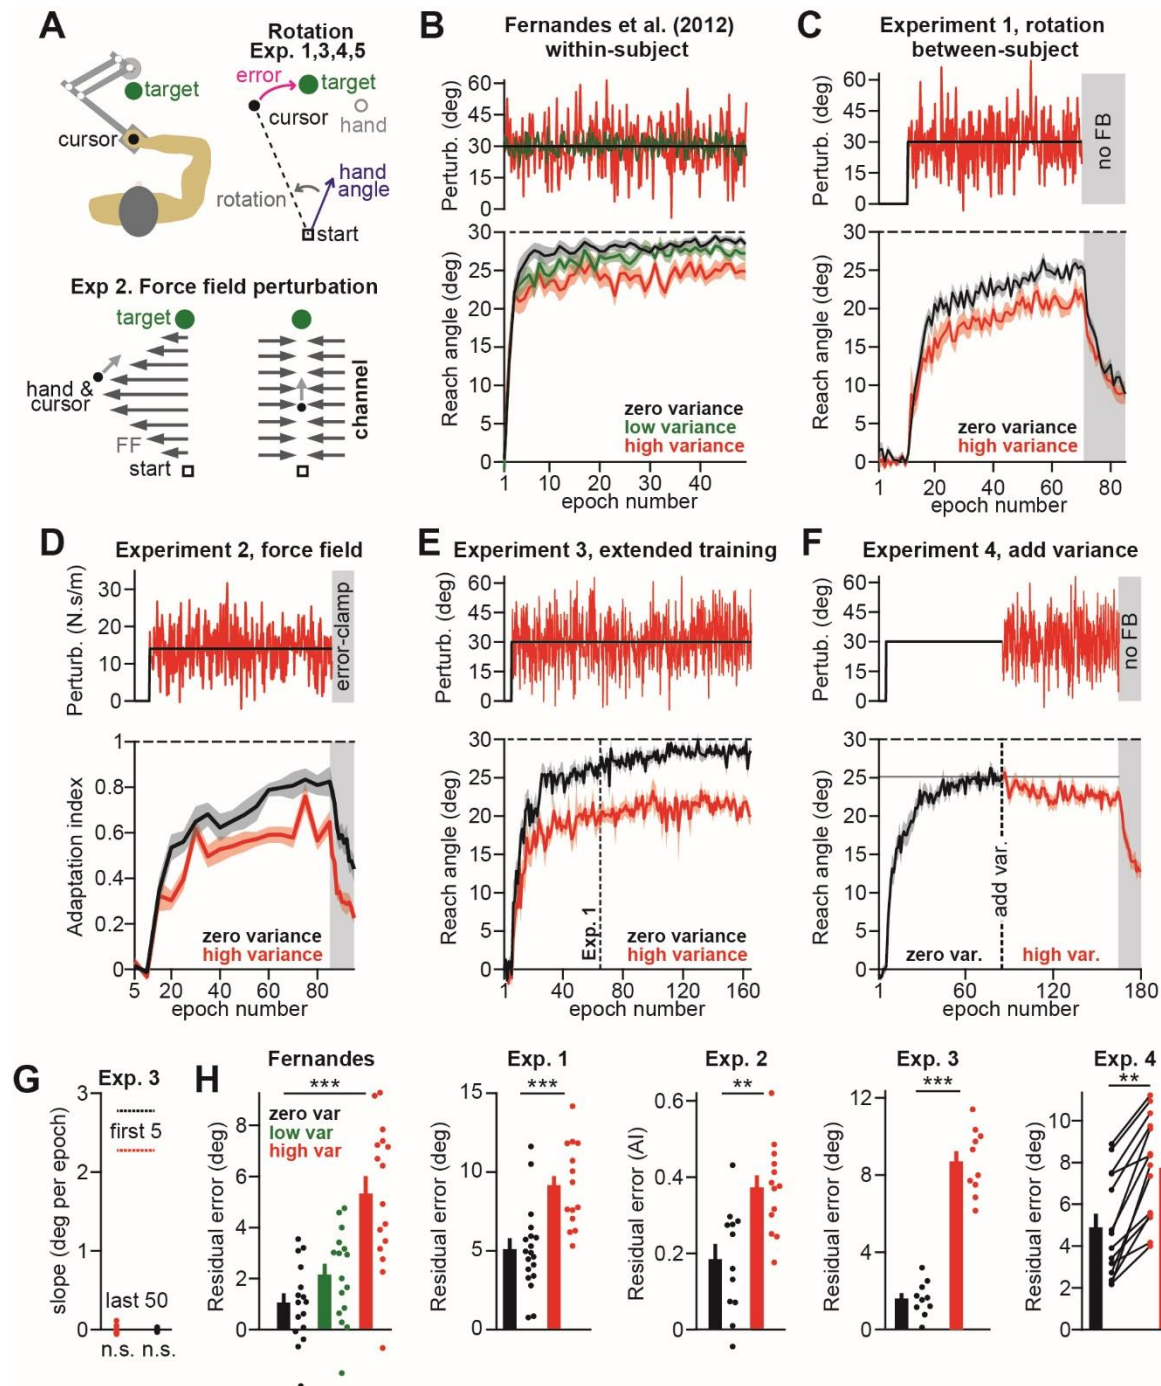

1014

1015

1016 **Figure 1.** Perturbation variance impairs sensorimotor adaptation. **A.** Schematic of our experiment setup. **B.**

1017 Fernandes and colleagues<sup>19</sup> measured the reach angle of participants (bottom, n=16) during adaptation to variable

1018 visuomotor rotations (top: SD = 0, 4, and 12° for zero, low, and high-variance; mean is 30° for all). Participants

1019 demonstrated differing residual errors (reported in inset **H**, **Fernandes**; median error on the last 48 trials). **C.** In

1020 Experiment 1, we repeated the experiment of Fernandes et al. (2012) with a between-subjects design. Participants

1021 adapted to a zero (n=19) or high (n=14) variance perturbation (SD = 0 and 12° for zero and high-variance; mean is

1022 30° for both). The residual error is shown in **H**, **Exp. 1** (median of the last 48 trials). **D.** In Experiment 2, we tested

1023 force field adaptation. Occasionally, we measured reaching forces on channel trials that restricted motion of the

hand to a straight path. Participants experienced a zero (n=12) or high (n=13) variance perturbation (top: SD = 0

1024 and 6 N-s/m for zero and high-variance; mean = 14 N-s/m for both). We computed an adaptation index on each  
1025 channel trial (bottom). Residual error (inset **H**, **Exp. 2**) is one minus mean adaptation index on last 5 error clamp  
1026 trials. **E**. In Experiment 3, we exposed participants to an extended period of visuomotor rotations (160 epochs =  
1027 640 trials). The vertical dashed line indicates the total number of rotation trials in Experiment 1. Participants  
1028 adapted to a zero (n=19) or high (n=14) variance perturbation (top: SD = 0 and 12° for zero and high-variance;  
1029 mean is 30° for both). Mean residual error (inset **H**, **Exp. 3**) was computed over the last 50 epochs. To confirm that  
1030 performance had reached a plateau, we measured the slope of a line fit to the same period (inset **G**). For  
1031 comparison, horizontal dashed lines show the mean slope over the first 5 epochs of the perturbation. **F**. In  
1032 Experiment 4, we adapted participants (n=14) to a zero-variance perturbation, and then abruptly switched to a  
1033 high-variance perturbation. Residual errors (inset **H**, **Exp. 4**) were computed over the last 10 epochs of each period.  
1034 Error bars are mean ± SEM. Statistics denote the result of a repeated-measured ANOVA (**H**, **Fernandes**) or two-  
1035 sample t-tests (**H**, all other insets). Statistics: \*\*p<0.01 and \*\*\*p<0.001.

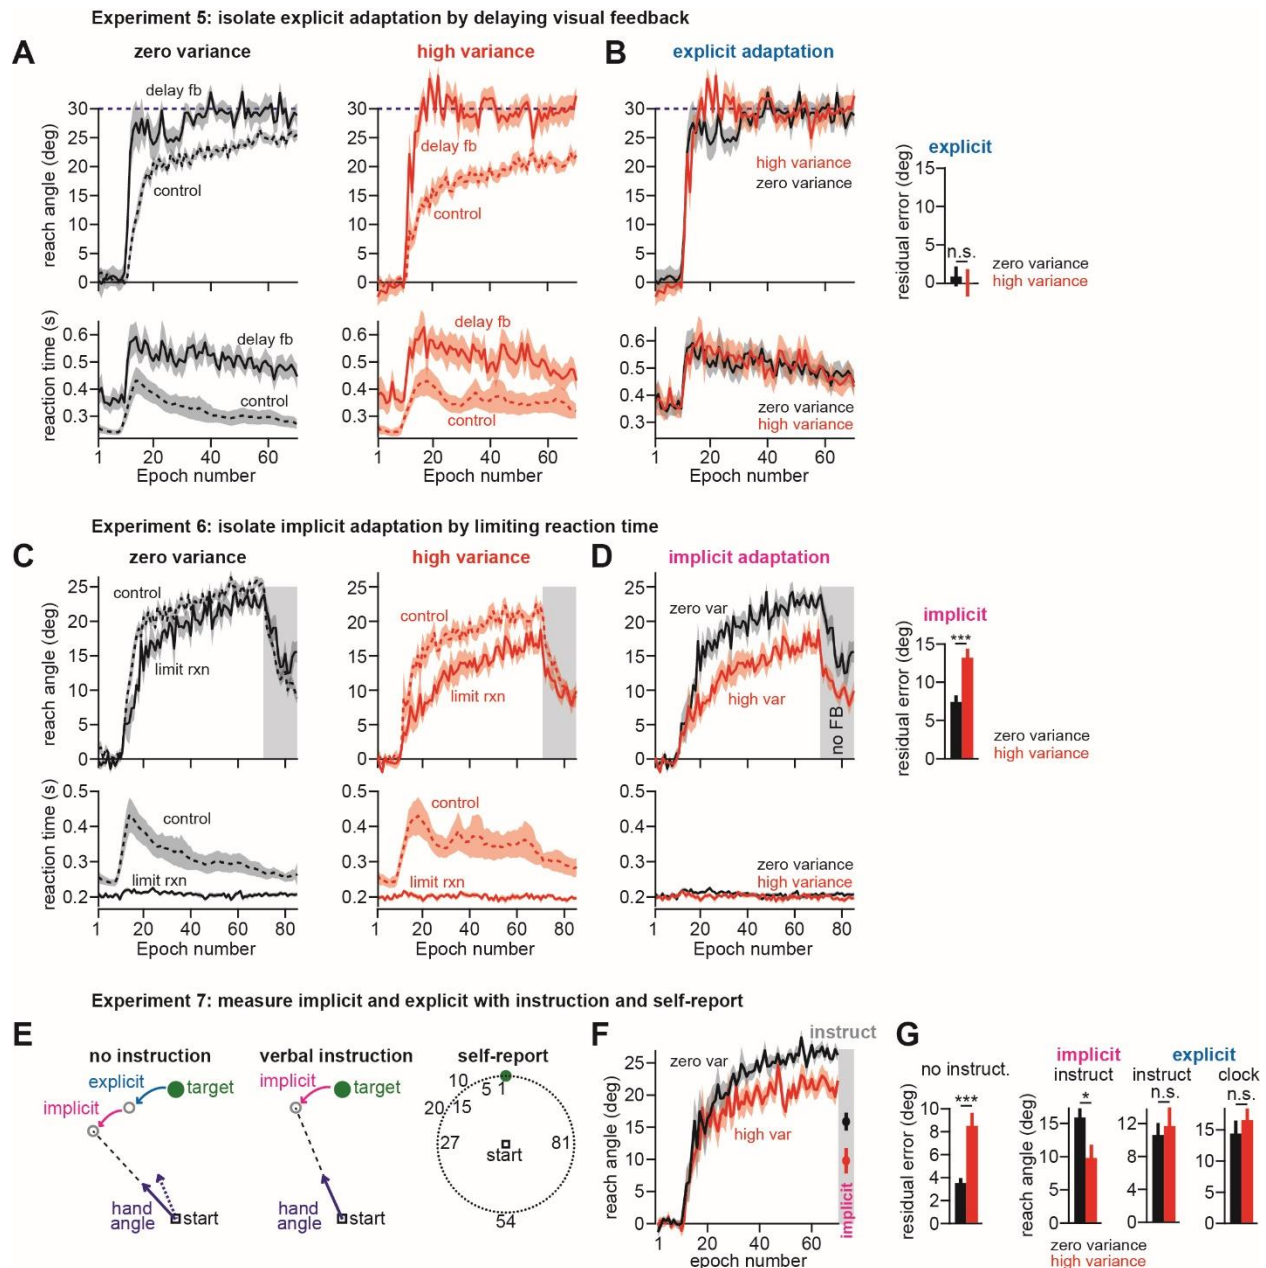

1036

1037 **Figure 2.** Perturbation variance altered the total extent of implicit, but not explicit adaptation. **A.** We exposed  
 1038 subjects to zero-variance and high-variance visuomotor rotations, under the conditions in Experiment 5 that  
 1039 isolated explicit adaptation (only endpoint feedback, with a delay of approximately 1 second). At left we show the  
 1040 explicit response (solid lines, “delay fb”) to the zero-variance perturbation and at right we show the explicit  
 1041 response to the high-variance perturbation. These responses are compared to the control conditions in Experiment  
 1042 1. At top we show reach angles and at bottom we show the corresponding reaction times. **B.** Here we compare the  
 1043 explicit response to the zero-variance and high-variance perturbation in Experiment 5. At right, we show the  
 1044 residual error over the last 10 epochs of the rotation period. **C.** We exposed subjects to a zero-variance and high-  
 1045 variance visuomotor rotations, under the conditions in Experiment 6 that isolated implicit adaptation (upper  
 1046 bound on reaction time to prevent the expression of explicit strategies). At left we show the implicit response  
 1047 (solid lines, “limit rxn”) to the zero-variance perturbation and at right we show the implicit response to the high-

1048 variance perturbation. These responses are compared to the control conditions in Experiment 1. At top we show  
1049 reach angles and at bottom we show the corresponding reaction times. **D.** Here we compare the implicit response  
1050 to the zero-variance and high-variance perturbation in Experiment 6. At right, we show the residual error over the  
1051 last 10 epochs of the rotation period. **E.** In Experiment 7, we measured the terminal levels of implicit and explicit  
1052 adaptation after learning using the control conditions in Experiment 1. Normally, learning is composed on implicit  
1053 and explicit elements (left schematic, no instruction). To isolate the implicit component, we verbally instructed  
1054 participants to move their hand (not the cursor) through the target without any feedback (middle schematic,  
1055 verbal instruction). To isolate the explicit component, we asked participants to indicate where they aimed their  
1056 hand using visual landmarks (right schematic, self-report). **F.** Here we show the reach angle during the learning  
1057 period in Experiment 7. In the gray region, we show the implicit learning remaining after the verbal instruction. **G.**  
1058 In column 1, we show the mean residual error in over the last 10 epochs of Experiment 7. In column 2, we show  
1059 the implicit learning at the end of adaptation that remained after the verbal instruction. In column 3, we obtained  
1060 the explicit reach angle by subtracting the implicit learning measured after verbal instruction from the total  
1061 learning curve measured prior to the verbal instruction. In column 4, we show the mean aiming angle self-reported  
1062 by the participants in each group. Error bars are mean  $\pm$  SEM. Statistics: \* $p < 0.05$ , \*\*\* $p < 0.001$ , and n.s. indicates  
1063  $p > 0.05$ .

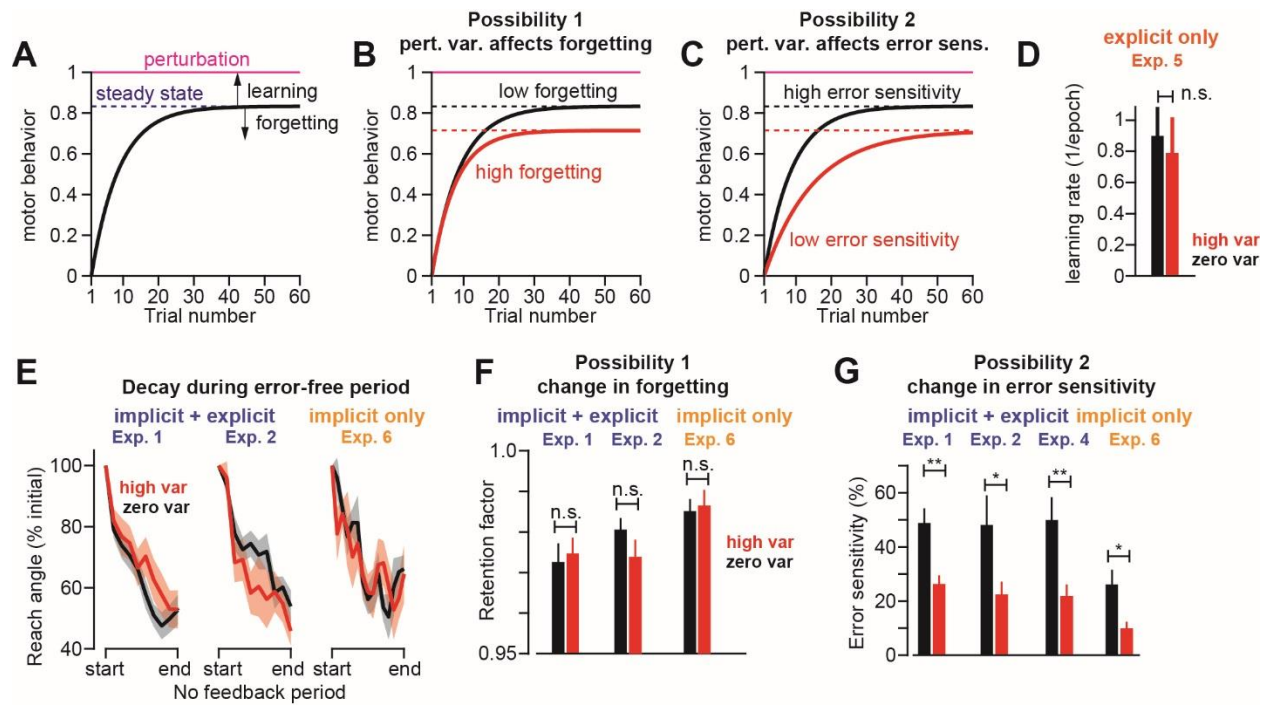

1064

1065 **Figure 3.** Perturbation variance decreases error sensitivity, not decay rates. **A.** State-space model of adaptation  
 1066 predicts that learning will reach an asymptote when the amount of learning from an error exactly counterbalances  
 1067 the amount of forgetting that occurs between trials. The plot demonstrates the behavior of such a model during  
 1068 adaptation to a perturbation of unit 1. According to the model, changes in asymptotic levels of performance can  
 1069 occur because of changes in forgetting (**B**, Possibility 1 schematic;  $a = 0.98$  for low forgetting and  $0.96$  for high  
 1070 forgetting), or changes in error sensitivity (**C**, Possibility 2 schematic;  $b = 0.05$  for low error sensitivity and  $0.1$  for  
 1071 high error sensitivity). **D.** Perturbation variance had no effect on the rate of explicit learning. Here we show the  
 1072 learning rate in the zero-variance and high-variance groups of Experiment 5 quantified with an exponential fit to  
 1073 individual participant behavior **E**. To test Possibility 1, we measured the retention during error-free periods at the  
 1074 end of Experiments 1 (left), 2 (middle), and 6 (right). We normalized reach angle to the first trial in the no-feedback  
 1075 period. Each point on the x-axis is a cycle of 4 trials. **F.** We measured the retention factor during error-free periods  
 1076 in each experiment depicted in **E**. We found no difference in retention for the zero-variance and high-variance  
 1077 groups. **G.** To test Possibility 2, we measured sensitivity to error in each experiment that terminated with an error-  
 1078 free period. Error sensitivity was greater for the zero-variance perturbation in every experiment. Error bars are  
 1079 mean  $\pm$  SEM. Statistics: \* $p < 0.05$ , \*\* $p < 0.01$ , and n.s. indicates no statistical significance.

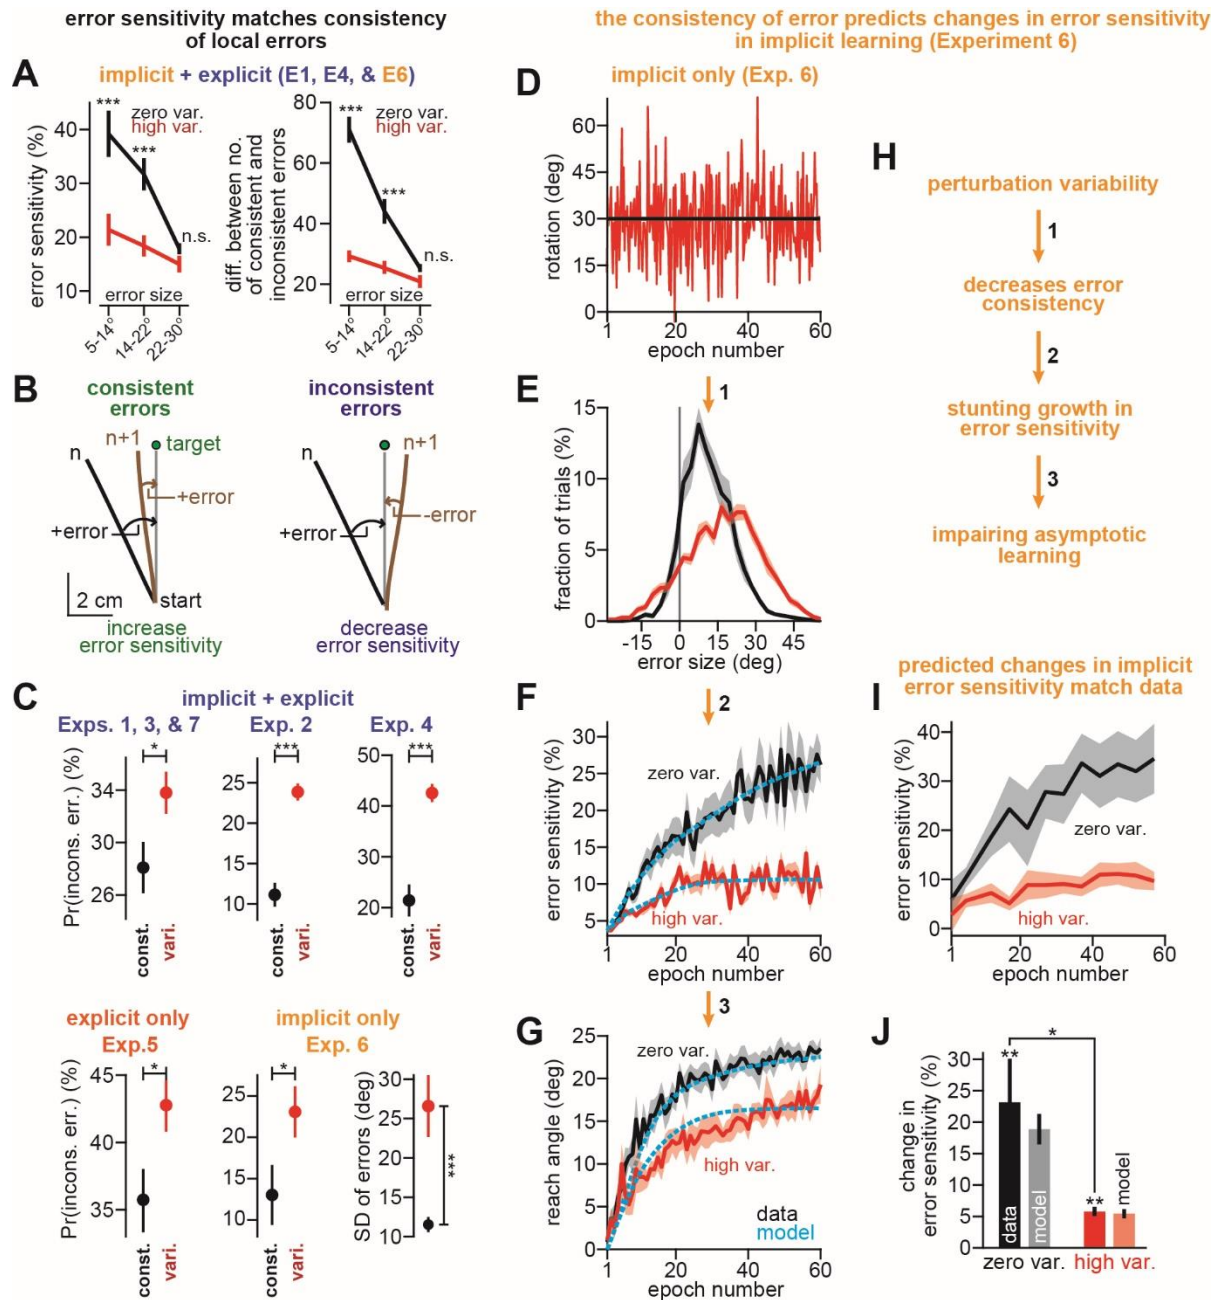

1080

1081 **Figure 4.** Spatiotemporal variation in error sensitivity is predicted by the consistency of error. **A.** Left: to determine  
 1082 how error sensitivity varied as a function of error size, we sorted pairs of movements into different bins according  
 1083 to the size of the error on the first movement. Next, we computed the mean error sensitivity across all trials within  
 1084 each error size bin. To increase power, we combined participants across all visuomotor rotation experiments with  
 1085 an implicit learning component and an error-free period in which retention could be independently measured  
 1086 (Experiments 1, 4, and 6). Right: the difference between the number of consistent and inconsistent errors during  
 1087 adaptation to the visuomotor rotation for the error sensitivity measurements at left. **B.** We considered the  
 1088 possibility that the trial-to-trial consistency of errors caused changes in error sensitivity. Consistent errors (left) are  
 1089 consecutive pairs of trials where the errors have the same sign. Inconsistent errors (right) are consecutive pairs of  
 1090 trials where the errors have opposite signs. The black and brown traces show example reach trajectories from a  
 1091 single participant. **C.** We measured the total fraction of inconsistent error trials. The high-variance perturbation



1092 caused a higher probability of inconsistent errors in every experiment. Each inset shows the probability of  
1093 experience in inconsistent error for a given experiment, or set of experiments. The only exception is at bottom-  
1094 right. Here we show the standard deviations of the error distributions corresponding to the zero-variance and  
1095 high-variance groups in Experiment 6 (distributions shown in **E**). **D-G**. Here we break down the behavior of our  
1096 decaying memory of errors model for the implicit-only behavior recorded in Experiment 6. Addition of variability to  
1097 the perturbation (**D**) altered the distribution of errors experienced in the high-variance group (**E**). Using the error  
1098 sequences (summarized in **E**) we used Eq. (1) to predict how implicit error sensitivity should vary as a function of  
1099 trial. The mean error sensitivity timecourse predicted by the model is shown in **F**. The noisy solid curves show the  
1100 mean timecourse across participants. The dashed blue lines show a smoothed version used for simulation of  
1101 behavior. In **G**, we simulate the implicit learning curves predicted by Eq. (1) using the implicit error sensitivity  
1102 depicted in **F** and the state-space model in Eqs. (3-5). **H**. Here we provide a verbal schematic depicting how the  
1103 decaying memory of errors model (Eq. (1)) translates changes in perturbation variance to differences in error  
1104 sensitivity, and ultimately, to two different asymptotic states of learning. **I**. Here we show the timecourse of error  
1105 sensitivity empirically measured across participants in Experiment 6. **J**. Here we show the change in error  
1106 sensitivity measured from the start to the end of learning for the measured behavior depicted in **I** (left bars in the  
1107 zero var. and high var. groups) and that predicted by Eq. (1) depicted in **F** (right bars in the zero var. and high var.  
1108 groups). Error bars are mean  $\pm$  SEM. For **A**, we used a mixed-ANOVA followed by post-hoc two-sample t-tests with  
1109 Bonferroni corrections. In **C** and **J**, two-sample or paired t-tests were used for statistical testing. Statistics: \* $p < 0.05$ ,  
1110 \*\* $p < 0.01$ , \*\*\* $p < 0.001$  and n.s. indicates no statistical significance.

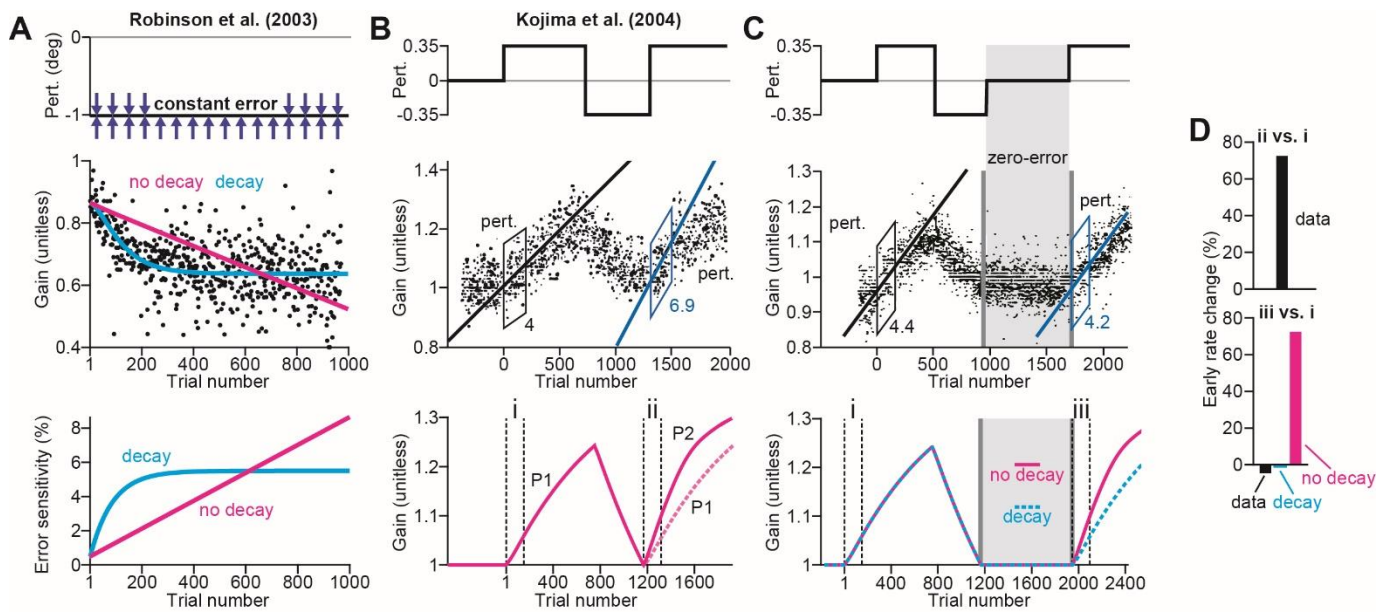

1111 **Figure 5.** The memory of errors decays over time. **A.** Data were obtained from Robinson and colleagues<sup>6</sup>. Monkeys  
 1112 were adapted to a gain-down saccade perturbation. The error on each trial was fixed to  $-1^\circ$  as shown at top. The  
 1113 black points in the middle inset the saccadic gain recorded on each trial. We fit the “decay” and “no decay” models  
 1114 to the trial-by-trial behavior in the least-squares sense. The decay model fit is shown in blue. The no decay model  
 1115 fit is shown in magenta. At bottom, we show the timecourse of error sensitivity predicted by the decay and no  
 1116 decay models. **B.** Data were obtained from Kojima and colleagues<sup>32</sup>. The authors adapted monkeys to a gain-up  
 1117 perturbation, followed by a gain-down perturbation, followed by a re-exposure to the gain-up perturbation.  
 1118 Paradigm is shown at top. Saccadic gain recorded on each trial during a representative session is shown at middle.  
 1119 The black and blue regression lines represent the linear fit to the first 150 trials during the initial exposure and re-  
 1120 exposure to the gain-up perturbation. Behavior exhibited savings in this paradigm, as indicated by the slope of the  
 1121 regression lines. At bottom, we show the output of the no decay memory of errors model described by Herzfeld  
 1122 and colleagues<sup>31</sup>. P1 refers to the first gain-up perturbation. P2 refers to the second gain-up perturbation. **C.** Data  
 1123 were obtained from Kojima and colleagues<sup>32</sup>. In a second experiment, monkeys adapted to a similar perturbation  
 1124 schedule as in **A**, only this time a long period of zero perturbation trials was added prior to the second gain-up  
 1125 adaptation period (shown at top; zero-error). Trial-by-trial saccadic gain is shown at middle. The regression lines  
 1126 indicate the slope of a linear fit to the first 150 trials during the initial exposure and re-exposure to the gain-up  
 1127 perturbation. Note that the “zero-error” period led to the loss of savings as indicated by the slope of the regression  
 1128 lines. At bottom, we show the behavior predicted by the “no decay” model where no decay in error sensitivity is  
 1129 permitted over the zero-error period (solid magenta line). In addition, we simulated a “decay” model, in which  
 1130 error sensitivity decayed during the zero-error period (dotted blue line). **D.** We quantified the slope of adaptation in **C** by fitting a line  
 1131 to the behavior of the “no decay” and “decay” models over the periods labeled “i” and “iii”. At top, we show the  
 1132 percent change in slope from “i” to “ii” present in the actual data. At bottom, we show the percent change in slope  
 1133 from “i” to “iii” present in the actual data, the “decay” model, and the “no decay” model.

## References

1. Donchin, O. *et al.* Cerebellar regions involved in adaptation to force field and visuomotor perturbation. *J. Neurophysiol.* **107**, 134–147 (2012).
2. Brashers-Krug, T., Shadmehr, R. & Bizzi, E. Consolidation in human motor memory. *Nature* **382**, 252–255 (1996).
3. Tseng, Y.-W., Diedrichsen, J., Krakauer, J. W., Shadmehr, R. & Bastian, A. J. Sensory prediction errors drive cerebellum-dependent adaptation of reaching. *J. Neurophysiol.* **98**, 54–62 (2007).
4. Krakauer, J. W., Pine, Z. M., Ghilardi, M. F. & Ghez, C. Learning of visuomotor transformations for vectorial planning of reaching trajectories. *J. Neurosci.* **20**, 8916–8924 (2000).
5. Ethier, V., Zee, D. S. & Shadmehr, R. Spontaneous Recovery of Motor Memory During Saccade Adaptation. *J. Neurophysiol.* **99**, 2577–2583 (2008).
6. Robinson, F. R., Noto, C. T. & Bevans, S. E. Effect of Visual Error Size on Saccade Adaptation in Monkey. *J. Neurophysiol.* **90**, 1235–1244 (2003).
7. Malone, L. A., Vasudevan, E. V. L. & Bastian, A. J. Motor Adaptation Training for Faster Relearning. *J. Neurosci.* **31**, 15136–15143 (2011).
8. Shadmehr, R., Brandt, J. & Corkin, S. Time-dependent motor memory processes in amnesic subjects. *J. Neurophysiol.* **80**, 1590–1597 (1998).
9. McDougale, S. D., Bond, K. M. & Taylor, J. A. Explicit and Implicit Processes Constitute the Fast and Slow Processes of Sensorimotor Learning. *J. Neurosci.* **35**, 9568–9579 (2015).
10. Taylor, J. A., Krakauer, J. W. & Ivry, R. B. Explicit and Implicit Contributions to Learning in a Sensorimotor Adaptation Task. *J. Neurosci.* **34**, 3023–3032 (2014).
11. Taylor, J. A. & Ivry, R. B. Flexible cognitive strategies during motor learning. *PLoS Comput. Biol.* **7**, e1001096 (2011).
12. Morehead, J. R., Taylor, J. A., Parvin, D. E. & Ivry, R. B. Characteristics of Implicit Sensorimotor Adaptation Revealed by Task-irrelevant Clamped Feedback. *J. Cogn. Neurosci.* **29**, 1061–1074 (2017).
13. Kim, H. E., Morehead, J. R., Parvin, D. E., Moazzezi, R. & Ivry, R. B. Invariant errors reveal limitations in motor correction rather than constraints on error sensitivity. *Commun. Biol.* **1**, 19 (2018).
14. Hegele, M. & Heuer, H. The impact of augmented information on visuo-motor adaptation in younger and older adults. *PLoS One* **5**, e12071–e12071 (2010).
15. Heuer, H. & Hegele, M. Adaptation to visuomotor rotations in younger and older adults. *Psychol. Aging* **23**, 190–202 (2008).
16. Vandevoorde, K. & Orban de Xivry, J.-J. Internal model recalibration does not deteriorate with age while motor adaptation does. *Neurobiol. Aging* **80**, 138–153 (2019).
17. Vaswani, P. A. *et al.* Persistent Residual Errors in Motor Adaptation Tasks: Reversion to Baseline and Exploratory Escape. *J. Neurosci.* **35**, 6969–6977 (2015).
18. Langsdorf, L., Maresch, J., Hegele, M., McDougale, S. D. & Schween, R. Prolonged reaction times eliminate residual errors in visuomotor adaptation. *bioRxiv* (2019). doi:10.1101/2019.12.26.888941
19. Fernandes, H. L., Stevenson, I. H. & Kording, K. P. Generalization of stochastic visuomotor rotations. *PLoS One* **7**, e43016 (2012).
20. Therrien, A. S., Wolpert, D. M. & Bastian, A. J. Increasing Motor Noise Impairs Reinforcement Learning in Healthy Individuals. *eNeuro* **5**, (2018).
21. Havermann, K. & Lappe, M. The Influence of the Consistency of Postsaccadic Visual Errors on Saccadic Adaptation. *J. Neurophysiol.* **103**, 3302–3310 (2010).
22. Fernandez-Ruiz, J., Wong, W., Armstrong, I. T. & Flanagan, J. R. Relation between reaction time and reach errors during visuomotor adaptation. *Behav. Brain Res.* **219**, 8–14 (2011).

23. McDougale, S. D. & Taylor, J. A. Dissociable cognitive strategies for sensorimotor learning. *Nat. Commun.* **10**, 40 (2019).
24. Leow, L.-A., Marinovic, W., de Rugy, A. & Carroll, T. J. Task errors drive memories that improve sensorimotor adaptation. *J. Neurosci.* (2020). doi:10.1523/JNEUROSCI.1506-19.2020
25. Held, R., Efstathiou, A. & Greene, M. Adaptation to displaced and delayed visual feedback from the hand. *J. Exp. Psychol.* **72**, 887–891 (1966).
26. Schween, R. & Hegele, M. Feedback delay attenuates implicit but facilitates explicit adjustments to a visuomotor rotation. *Neurobiol. Learn. Mem.* **140**, 124–133 (2017).
27. Smith, M. A., Ghazizadeh, A. & Shadmehr, R. Interacting adaptive processes with different timescales underlie short-term motor learning. *PLoS Biol.* **4**, e179 (2006).
28. Kording, K. P., Tenenbaum, J. B. & Shadmehr, R. The dynamics of memory as a consequence of optimal adaptation to a changing body. *Nat. Neurosci.* **10**, 779–786 (2007).
29. Coltman, S. K., Cashaback, J. G. A. & Gribble, P. L. Both fast and slow learning processes contribute to savings following sensorimotor adaptation. *J. Neurophysiol.* **121**, 1575–1583 (2019).
30. van der Vliet, R. *et al.* Individual Differences in Motor Noise and Adaptation Rate Are Optimally Related. *eNeuro* **5**, (2018).
31. Herzfeld, D. J., Vaswani, P. A., Marko, M. K. & Shadmehr, R. A memory of errors in sensorimotor learning. *Science (80-. )*. **345**, 1349–1353 (2014).
32. Kojima, Y., Iwamoto, Y. & Yoshida, K. Memory of Learning Facilitates Saccadic Adaptation in the Monkey. *J. Neurosci.* **24**, 7531–7539 (2004).
33. Kitago, T., Ryan, S. L., Mazzoni, P., Krakauer, J. W. & Haith, A. M. Unlearning versus savings in visuomotor adaptation: comparing effects of washout, passage of time, and removal of errors on motor memory. *Front. Hum. Neurosci.* **7**, 307 (2013).
34. Leow, L.-A., de Rugy, A., Marinovic, W., Riek, S. & Carroll, T. J. Savings for visuomotor adaptation require prior history of error, not prior repetition of successful actions. *J. Neurophysiol.* **116**, 1603–1614 (2016).
35. Sing, G. C. & Smith, M. A. Reduction in learning rates associated with anterograde interference results from interactions between different timescales in motor adaptation. *PLoS Comput. Biol.* **6**, e1000893 (2010).
36. Scheidt, R. A., Reinkensmeyer, D. J., Conditt, M., Rymer, W. Z. & Mussa-ivaldi, F. A. Persistence of motor adaptation during constrained, multi-joint, arm movements. *J. Neurophysiol.* **84**, 853–862 (2000).
37. Mazzoni, P. & Krakauer, J. W. An implicit plan overrides an explicit strategy during visuomotor adaptation. *J. Neurosci.* **26**, 3642–3645 (2006).
38. Hwang, E. J., Smith, M. A. & Shadmehr, R. Dissociable effects of the implicit and explicit memory systems on learning control of reaching. *Exp. brain Res.* **173**, 425–437 (2006).
39. Schween, R., Taube, W., Gollhofer, A. & Leukel, C. Online and post-trial feedback differentially affect implicit adaptation to a visuomotor rotation. *Exp. brain Res.* **232**, 3007–3013 (2014).
40. Brudner, S. N., Kethidi, N., Graeupner, D., Ivry, R. B. & Taylor, J. A. Delayed feedback during sensorimotor learning selectively disrupts adaptation but not strategy use. *J. Neurophysiol.* **115**, 1499–1511 (2016).
41. Ekerot, C. F. & Kano, M. Stimulation parameters influencing climbing fibre induced long-term depression of parallel fibre synapses. *Neurosci. Res.* **6**, 264–268 (1989).
42. Herzfeld, D. J., Kojima, Y., Soetedjo, R. & Shadmehr, R. Encoding of error and learning to correct that error by the Purkinje cells of the cerebellum. *Nat. Neurosci.* **21**, 736–743 (2018).
43. Haith, A. M., Huberdeau, D. M. & Krakauer, J. W. The Influence of Movement Preparation Time on the Expression of Visuomotor Learning and Savings. *J. Neurosci.* **35**, 5109–5117 (2015).
44. Leow, L.-A., Gunn, R., Marinovic, W. & Carroll, T. J. Estimating the implicit component of

- visuomotor rotation learning by constraining movement preparation time. *J. Neurophysiol.* **118**, 666–676 (2017).
45. Maresch, J., Werner, S. & Donchin, O. Methods matter: your measures of explicit and implicit processes in visuomotor adaptation affect your results. *bioRxiv* (2020). doi:10.1101/702290
  46. Marko, M. K., Haith, A. M., Harran, M. D. & Shadmehr, R. Sensitivity to prediction error in reach adaptation. *J. Neurophysiol.* **108**, 1752–1763 (2012).
  47. Wei, K. & Kording, K. Relevance of error: what drives motor adaptation? *J. Neurophysiol.* **101**, 655–664 (2009).
  48. Zarahn, E., Weston, G. D., Liang, J., Mazzoni, P. & Krakauer, J. W. Explaining Savings for Visuomotor Adaptation: Linear Time-Invariant State-Space Models Are Not Sufficient. *J. Neurophysiol.* **100**, 2537–2548 (2008).
  49. Mawase, F., Shmuelof, L., Bar-Haim, S. & Karniel, A. Savings in locomotor adaptation explained by changes in learning parameters following initial adaptation. *J. Neurophysiol.* **111**, 1444–1454 (2014).
  50. Yin, C. & Wei, K. Savings in sensorimotor adaptation without an explicit strategy. *J. Neurophysiol.* **123**, 1180–1192 (2020).
  51. Wilterson, S. A. & Taylor, J. A. Implicit visuomotor adaptation remains limited after several days of training. *bioRxiv* (2019). doi:10.1101/711598
  52. Morehead, J. R., Qasim, S. E., Crossley, M. J. & Ivry, R. Savings upon Re-Aiming in Visuomotor Adaptation. *J. Neurosci.* **35**, 14386–14396 (2015).
  53. Bond, K. M. & Taylor, J. A. Flexible explicit but rigid implicit learning in a visuomotor adaptation task. *J. Neurophysiol.* **113**, 3836–3849 (2015).
  54. Avraham, G., Keizman, M. & Shmuelof, L. Environmental Consistency Modulation of Error Sensitivity During Motor Adaptation is Explicitly Controlled. *J. Neurophysiol.* (2019). doi:10.1152/jn.00080.2019
  55. Huberdeau, D. M., Haith, A. M. & Krakauer, J. W. Formation of a long-term memory for visuomotor adaptation following only a few trials of practice. *J. Neurophysiol.* **114**, 969–977 (2015).
  56. Neville, K.-M. & Cressman, E. K. The influence of awareness on explicit and implicit contributions to visuomotor adaptation over time. *Exp. Brain Res.* **236**, 2047–2059 (2018).
  57. Miyamoto, Y. R., Wang, S. & Smith, M. A. Implicit adaptation compensates for erratic explicit strategy in human motor learning. *Nat. Neurosci.* **23**, 443–455 (2020).
  58. Gonzalez Castro, L. N., Hadjiosif, A. M., Hemphill, M. A. & Smith, M. A. Environmental Consistency Determines the Rate of Motor Adaptation. *Curr. Biol.* **24**, 1050–1061 (2014).
  59. Smith, M. A. & Shadmehr, R. Modulation of the rate of error-dependent learning by statistical properties of the task. in *Advances in Computational Motor Control* (2004).
  60. Lerner, G. *et al.* The origins of anterograde interference in visuomotor adaptation. *bioRxiv* 593996 (2019). doi:10.1101/593996
  61. Thoroughman, K. & Shadmehr, R. Learning of action through adaptive combination of motor primitives. *Nature* **407**, 742–7 (2000).
  62. van der Kooij, K., Brenner, E., van Beers, R. J. & Smeets, J. B. J. Visuomotor adaptation: how forgetting keeps us conservative. *PLoS One* **10**, e0117901 (2015).
  63. Robinson, F. R., Soetedjo, R. & Noto, C. Distinct short-term and long-term adaptation to reduce saccade size in monkey. *J. Neurophysiol.* **96**, 1030–1041 (2006).
  64. Kojima, Y. & Soetedjo, R. Change in sensitivity to visual error in superior colliculus during saccade adaptation. *Sci. Rep.* **7**, 9566 (2017).
  65. Kojima, Y. & Soetedjo, R. Elimination of the error signal in the superior colliculus impairs saccade motor learning. *Proc. Natl. Acad. Sci.* **115**, E8987–E8995 (2018).

66. Huang, V. S., Haith, A., Mazzoni, P. & Krakauer, J. W. Rethinking motor learning and savings in adaptation paradigms: model-free memory for successful actions combines with internal models. *Neuron* **70**, 787–801 (2011).
67. Baddeley, R. J., Ingram, H. A. & Miall, R. C. System identification applied to a visuomotor task: near-optimal human performance in a noisy changing task. *J. Neurosci.* **23**, 3066–3075 (2003).
68. Kalman, R. A New Approach to Linear Filtering and Prediction Problems. *ASME J. Basic Eng.* 34–45 (1960).
69. Burge, J., Ernst, M. O. & Banks, M. S. The statistical determinants of adaptation rate in human reaching. *J. Vis.* **8**, 1–19 (2008).
70. van Beers, R. J. How does our motor system determine its learning rate? *PLoS One* **7**, e49373–e49373 (2012).
71. Wei, K. & Körding, K. Uncertainty of feedback and state estimation determines the speed of motor adaptation. *Front. Comput. Neurosci.* **4**, 11 (2010).
72. Xu-Wilson, M., Chen-Harris, H., Zee, D. S. & Shadmehr, R. Cerebellar Contributions to Adaptive Control of Saccades in Humans. *J. Neurosci.* **29**, 12930–12939 (2009).
73. Galea, J. M., Vazquez, A., Pasricha, N., Orban De Xivry, J. J. & Celnik, P. Dissociating the roles of the cerebellum and motor cortex during adaptive learning: The motor cortex retains what the cerebellum learns. *Cereb. Cortex* **21**, 1761–1770 (2011).
74. Herzfeld, D. J. *et al.* Contributions of the cerebellum and the motor cortex to acquisition and retention of motor memories. *Neuroimage* **98**, 147–158 (2014).
75. Hanajima, R. *et al.* Modulation of error-sensitivity during a prism adaptation task in people with cerebellar degeneration. *J. Neurophysiol.* **114**, 2460–2471 (2015).
76. Kim, S., Ogawa, K., Lv, J., Schweighofer, N. & Imamizu, H. Neural Substrates Related to Motor Memory with Multiple Timescales in Sensorimotor Adaptation. *PLoS Biol.* **13**, e1002312 (2015).
77. Herzfeld, D. J., Kojima, Y., Soetedjo, R. & Shadmehr, R. Encoding of action by the Purkinje cells of the cerebellum. *Nature* **526**, 439–442 (2015).
78. Soetedjo, R., Kojima, Y. & Fuchs, A. F. Complex spike activity in the oculomotor vermis of the cerebellum: a vectorial error signal for saccade motor learning? *J. Neurophysiol.* **100**, 1949–1966 (2008).
79. Yang, Y. & Lisberger, S. G. Role of plasticity at different sites across the time course of cerebellar motor learning. *J. Neurosci.* **34**, 7077–90 (2014).
80. Kim, H. E., Parvin, D. E. & Ivry, R. B. The influence of task outcome on implicit motor learning. *Elife* **8**, e39882 (2019).
81. Albert, S. T. & Shadmehr, R. Estimating properties of the fast and slow adaptive processes during sensorimotor adaptation. *J. Neurophysiol.* **119**, 1367–1393 (2018).
